# Supplementary material for: Early Weaning and Milk Substitutes Affect the Gut Microbiome, Metabolomics, and Antibody Profile in Goat Kids Suffering From Diarrhea
Source: Front Microbiol. 2022 Jun 21;13:904475. doi: 10.3389/fmicb.2022.904475 (PMC9253616; doi:10.3389/fmicb.2022.904475)
Supplement: Supplementary file 6 [file Table_6.XLSX]

## Sheet: Sheet1
Supplementary Table S6. Relative quantity of each carbohydrate enzyme family in CAZy.
Family	activities	HK01	HK02	HK03	HK04	HK05	HK06	HK07	HK08	HK09	HK10	DK01	DK02	DK03	DK04	DK05	DK06	DK07	DK08	DK09	DK10
AA1	Laccase / p-diphenol:oxygen oxidoreductase / ferroxidase (EC 1.10.3.2); ; ferroxidase (EC 1.10.3.-); Laccase-like multicopper oxidase (EC 1.10.3.-)	1.07502e-06	1.34246e-06	2.88765e-05	0	9.48128e-07	5.84659e-06	0	4.05898e-06	6.54421e-07	1.09672e-05	0	0	0	0	4.16725e-05	0	0	0	6.97066e-07	0
AA10	AA10 (formerly CBM33) proteins are copper-dependent lytic polysaccharide monooxygenases (LPMOs); some proteins have been shown to act on chitin, others on cellulose; lytic cellulose monooxygenase (C1-hydroxylating) (EC 1.14.99.54); lytic cellulose monooxygenase (C4-dehydrogenating)(EC 1.14.99.56); lytic chitin monooxygenase (EC 1.14.99.53)	3.58338e-07	0	3.81627e-07	4.3504e-06	5.41788e-07	0	9.64956e-06	0	0	7.03023e-07	5.24486e-07	2.25863e-05	0	0	5.14475e-07	0	0	4.58797e-06	0	0
AA11	AA11 proteins are copper-dependent lytic polysaccharide monooxygenases (LPMOs); cleavage of chitin chains with oxidation of C-1 has been demonstrated for a AA11 LPMO from Aspergillus oryzae;	0	0	0	0	0	0	0	0	0	7.03023e-07	0	0	0	0	0	0	0	0	1.0456e-06	0
AA12	The pyrroloquinoline quinone-dependent oxidoreductase activity was demonstrated for the CC1G_09525 protein of Coprinopsis cinerea.	3.58338e-07	3.29512e-06	0.000108637	0	2.16715e-06	8.57923e-05	0	4.21844e-05	0	5.25861e-05	0	0	0	0	0.000194729	0	7.12869e-07	0	0	0
AA2	manganese peroxidase (EC 1.11.1.13); versatile peroxidase (EC 1.11.1.16); lignin peroxidase (EC 1.11.1.14); peroxidase (EC 1.11.1.-)	8.52845e-05	0.000119723	8.00145e-05	2.58305e-06	6.78589e-05	5.38903e-05	1.81639e-05	0.000216285	2.25121e-05	5.75073e-05	1.18009e-05	1.39881e-05	2.45766e-05	3.8941e-05	1.00323e-05	4.69338e-05	9.98016e-07	1.00639e-05	2.614e-06	3.18807e-05
AA3	cellobiose dehydrogenase (EC 1.1.99.18); glucose 1-oxidase (EC 1.1.3.4); aryl alcohol oxidase (EC 1.1.3.7); alcohol oxidase (EC 1.1.3.13); pyranose oxidase (EC 1.1.3.10)	7.01149e-05	0.000148891	0.00029309	6.04978e-05	7.76111e-05	0.000174762	4.2004e-05	0.00010046	3.14122e-05	0.000123029	0.000191044	4.26059e-05	2.35308e-05	2.59607e-05	0.000510617	0.000467432	0.000364133	5.83116e-05	9.41039e-06	9.15721e-05
AA4	vanillyl-alcohol oxidase (EC 1.1.3.38)	0.00014023	0.000111058	0.000292581	1.3731e-05	8.60088e-05	0.000142733	2.21372e-05	0.000128583	7.53893e-05	0.000148478	3.05513e-05	3.25961e-05	2.30079e-05	2.79077e-05	0.000255823	9.29146e-06	7.27126e-06	2.78238e-05	1.67296e-05	3.52722e-05
AA5	Oxidase with oxygen as acceptor (EC 1.1.3.-); galactose oxidase (EC 1.1.3.9); glyoxal oxidase (EC 1.2.3.15); alcohol oxidase (EC 1.1.3.13)	2.38892e-07	3.29512e-06	0	9.51651e-07	0	0	0	0	0	0	0	0	0	0	0	0	0	0	0	0
AA6	1,4-benzoquinone reductase (EC. 1.6.5.6)	0.000579911	0.000607034	0.000665558	0.000673089	0.000517001	0.000738958	0.000142473	0.000577099	0.000724837	0.00071385	0.000687208	0.000452367	0.000173605	0.000113578	0.000594219	0.000614547	0.000737962	0.000654156	0.000323264	0.000229269
AA7	glucooligosaccharide oxidase (EC 1.1.3.-); chitooligosaccharide oxidase (EC 1.1.3.-)	7.45344e-05	0.000113865	9.41347e-05	1.71297e-05	6.90779e-05	0.000185184	2.78134e-05	6.05947e-05	5.69346e-05	0.000110375	1.86193e-05	3.50344e-05	2.14391e-05	3.5696e-05	7.15121e-05	4.19307e-05	5.4178e-06	1.64279e-05	1.89951e-05	4.00204e-05
AA9	AA9 (formerly GH61) proteins are copper-dependent lytic polysaccharide monooxygenases (LPMOs); cleavage of cellulose chains with oxidation of carbons C1 and/or C4 and C-6); lytic cellulose monooxygenase (C1-hydroxylating) (EC 1.14.99.54); lytic cellulose monooxygenase (C4-dehydrogenating) (EC 1.14.99.56)	9.55569e-07	0	0	0	0	0	0	0	0	0	0	0	0	0	0	0	0	5.91996e-07	8.71333e-07	0
CBM1	Modules of approx. 40 residues found almost exclusively in fungi. The cellulose-binding function has been demonstrated in many cases, and appears to be mediated by three aromatic residues separated by about 10.4 angstrom and which form a flat surface. The only non-fungal occurence of CBM1 is in an algal non-hydrolytic polysaccharide-binding protein which is composed of four repeated CBM1 modules.…	3.58338e-07	9.76331e-07	0	0	0	0	1.13524e-06	1.15971e-06	0	0	0	0	0	0	0	0	0	0	0	0
CBM10	Modules of approx. 50 residues. The cellulose-binding function has been demonstrated in one case.	0	0	3.81627e-07	0	2.70894e-07	0	0	0	0	2.81209e-07	0	0	0	0	0	0	1.14059e-06	0	1.0456e-06	0
CBM11	Modules of approx. 180-200 residues. The CBM11 of Clotridium thermocellum Cel26A-Cel5E has been shown to bind both β-1,4-glucan and β-1,3-1,4-mixed linked glucans.	4.6584e-06	5.73595e-06	3.68906e-06	2.85495e-06	2.84438e-06	3.68589e-06	1.24877e-05	1.73956e-06	5.23537e-07	2.24967e-06	4.93017e-05	4.61992e-06	2.09162e-06	1.29803e-06	2.39231e-05	0.000111855	9.35284e-05	4.29197e-06	0	3.12023e-05
CBM12	Modules of approx. 40-60 residues. The majority of these modules is found among chitinases where the function is chitin-binding. Distantly related to the CBM5 family.	3.882e-05	2.46524e-05	6.56399e-05	8.85035e-05	3.41326e-05	6.50751e-05	1.192e-05	0.000106113	2.04179e-05	5.59606e-05	6.50363e-05	4.72258e-05	4.18325e-06	0	6.16084e-05	7.98113e-06	5.14691e-05	3.61118e-05	0.000126343	3.93421e-05
CBM13	Modules of approx. 150 residues which always appear as a threefold internal repeat. The only apparent exception to this, xylanase II of Actinomadura sp. FC7 (GenBank U08894), is in fact not completely sequenced. These modules were first identified in several plant lectins such as ricin or agglutinin of Ricinus communis which bind galactose residues. The three-dimensional structure of a plant lect…	4.40756e-05	4.01516e-05	5.71169e-05	0.000154983	5.33661e-05	7.33365e-05	2.21372e-05	6.3494e-05	7.8007e-05	6.80526e-05	0.000179112	0.000117423	2.71911e-05	8.43722e-06	2.77817e-05	7.45699e-05	8.82531e-05	0.000136899	7.94655e-05	6.37613e-05
CBM14	Modules of approx. 70 residues. The chitin-binding function has been demonstrated in several cases. These modules are found attached to a number of chitinase catalytic domains, but also in non-catalytic proteins either in isolation or as multiple repeats; chitin binding (EC IIa.chitin)	1.19446e-06	4.39349e-06	7.63255e-07	2.4471e-06	1.96398e-05	0	6.81145e-06	3.76905e-06	5.23537e-07	6.46781e-06	6.55608e-07	2.56662e-06	1.04581e-05	1.16823e-05	0	1.42946e-06	1.42574e-06	2.07199e-06	1.91693e-06	0
CBM15	Binding to xylan and xylooligosaccharides has been demonstrated in the case of Xyn10C of Cellvibrio mixtus.	3.58338e-07	0	0	0	0	0	0	2.31942e-06	0	0	0	0	0	0	9.00332e-07	0	0	0	6.97066e-07	0
CBM16	Carbohydrate-binding module 16. Binding to cellulose and glucomannan demonstrated [B. Bae et al (2008) J Biol Chem. 283:12415-25 (PMID: 18025086)]	7.78789e-05	4.125e-05	2.2516e-05	0.000125754	0.000117026	1.57604e-05	2.61106e-05	4.84178e-05	0.000186379	3.30421e-05	6.60853e-05	5.21024e-05	2.7714e-05	9.73526e-06	5.27337e-06	0.00011936	6.61542e-05	8.70234e-05	0.000260354	8.81806e-06
CBM17	Modules of approx. 200 residues. Binding to amorphous cellulose, cellooligosaccharides and derivatized cellulose has been demonstrated.	0	0	0	0	0	7.62598e-07	0	0	0	0	2.62243e-06	1.41164e-06	0	0	0	2.97803e-06	4.27721e-07	0	0	2.03494e-06
CBM18	Modules of approx. 40 residues. The chitin-binding function has been demonstrated in many cases. These modules are found attached to a number of chitinase catalytic domains, but also in non-catalytic proteins either in isolation or as multiple repeats.	0	0	0	0	9.48128e-07	0	0	0	0	8.43628e-07	0	0	0	0	0	0	0	0	6.97066e-07	0
CBM19	Modules of 60-70 residues with chitin-binding function.	0	7.32249e-06	5.08836e-07	6.79751e-07	6.77234e-07	0	0	2.89927e-07	0	0	0	0	0	0	0	0	1.85346e-06	4.43997e-07	0	0
CBM2	Modules of approx. 100 residues and which are found in a large number of bacterial enzymes. The cellulose-binding function has been demonstrated in many cases. Several of these modules have been shown to also bind chitin or xylan.	5.73341e-06	6.4682e-06	9.7951e-06	6.79751e-06	4.46975e-06	1.5252e-06	2.27048e-06	1.11622e-05	4.18829e-06	1.15296e-05	6.42496e-06	3.20828e-06	3.66034e-06	0	5.14475e-06	3.81188e-06	6.98611e-06	1.30239e-05	2.63142e-05	1.35662e-06
CBM20	The granular starch-binding function has been demonstrated in several cases. Interact strongly with cyclodextrins. Often designated as starch-binding domains (SBD).	2.71143e-05	1.97707e-05	3.3456e-05	0.000156886	5.6075e-05	4.06719e-06	3.97335e-05	6.91476e-05	1.20413e-05	9.37833e-05	4.26145e-05	5.21024e-05	9.93521e-06	7.78821e-06	3.21547e-06	1.90594e-05	7.41383e-05	9.78273e-05	0.000124078	6.78312e-06
CBM21	Modules of approx. 100 residues. The granular starch-binding function has been demonstrated in one case. Sometimes designated as starch-binding domains (SBD).	8.36123e-07	7.81065e-06	0	0	0	0	0	1.15971e-06	1.17796e-06	0	0	0	0	0	0	0	0	0	0	0
CBM22	A xylan binding function has been demonstrated in several cases and affinity with mixed β-1,3/β-1,4-glucans in one. In several cases a thermostabilizing effect has also been seen.	2.15003e-05	1.63536e-05	1.094e-05	6.2809e-05	2.20778e-05	5.21109e-06	6.81145e-06	2.31942e-05	6.12538e-05	1.63101e-05	3.00268e-05	4.04243e-05	1.56872e-06	0	4.50166e-06	6.5755e-05	2.9085e-05	6.63035e-05	7.31919e-05	8.13974e-06
CBM23	Mannan-binding function demonstrated in one case.	1.48113e-05	1.14719e-05	1.3993e-06	2.31115e-05	1.34092e-05	4.95689e-06	2.8381e-06	3.04423e-06	6.51803e-05	4.78056e-06	1.65213e-05	3.46494e-06	4.18325e-06	2.59607e-06	0	3.31157e-05	3.20791e-05	1.47999e-05	2.614e-06	0
CBM24	α-1,3-glucan (mutan)-binding function demonstrated in two cases (PMID:10636904)	0	0	0	0	0	0	0	0	0	0	0	0	0	0	0	0	0	0	3.48533e-07	0
CBM25	Starch-binding function demonstrated in one case.	1.61252e-05	0	1.01767e-06	2.63743e-05	4.74064e-06	2.54199e-06	0	5.07372e-06	5.23537e-07	0	5.90047e-06	2.43829e-06	0	0	1.54343e-06	3.45452e-06	2.66613e-05	2.26438e-05	2.26546e-05	1.35662e-06
CBM26	Starch-binding function demonstrated in two cases.	3.61922e-05	2.53846e-05	4.57953e-06	6.25371e-05	1.89626e-05	1.61417e-05	6.81145e-06	4.24743e-05	2.4868e-06	1.56071e-05	2.75355e-05	1.51431e-05	3.13744e-06	1.29803e-05	0	4.06204e-05	8.49739e-05	6.58595e-05	0.000264885	9.49637e-06
CBM27	Mannan-binding function demonstrated in two cases	0	2.80695e-06	1.01767e-06	1.76735e-06	4.06341e-07	3.81299e-07	0	5.79854e-07	4.56786e-05	5.62418e-07	0	3.84993e-07	0	0	7.71713e-07	8.81498e-06	0	1.18399e-06	1.39413e-06	0
CBM28	The module from the endo-1,4-glucanase of Bacillus sp. 1139 binds to non-crystalline cellulose, cellooligosaccharides, and β-(1,3)(1,4)-glucans	0	0	0	1.3595e-07	0	0	0	0	0	0	0	0	0	0	0	0	0	0	0	0
CBM29	Binding to mannan/glucomannan has been demonstrated.	2.38892e-07	0	2.03535e-06	2.9909e-06	1.35447e-07	0	0	8.69781e-07	0	5.62418e-07	0	1.92497e-06	1.56872e-06	0	0	0	7.12869e-07	2.95998e-07	1.39413e-06	0
CBM3	Modules of approx. 150 residues found in bacterial enzymes. The cellulose-binding function has been demonstrated in many cases. In one instance binding to chitin has been reported.	1.07502e-06	3.90533e-06	0	1.76735e-06	9.88762e-06	1.271e-07	0	1.44963e-06	3.2721e-06	0	0	3.07995e-06	0	0	6.94542e-06	0	4.56236e-06	4.58797e-06	2.26546e-06	5.4265e-06
CBM30	Binding to cellulose has been demonstrated for the N-terminal module of Fibrobacter succinogenes CelF.	8.48068e-06	1.34246e-05	9.28627e-06	1.80814e-05	2.12652e-05	1.1439e-06	0	1.33366e-05	1.30884e-07	1.75756e-05	1.27188e-05	1.39881e-05	1.04581e-06	0	1.80066e-06	2.14418e-06	1.62534e-05	1.21359e-05	2.00406e-05	9.49637e-06
CBM31	Binding to β-1,3-xylan has been demonstrated for the C-terminal module of the β-1,3-xylanase of Alcaligenes sp. XY234.	0	0	0	1.34591e-05	0	0	0	0	0	1.26544e-06	4.8515e-06	0	3.13744e-06	0	0	0	7.12869e-07	1.06559e-05	5.05373e-06	0
CBM32	Binding to galactose and lactose has been demonstrated for the module of Micromonospora viridifaciens sialidase (PMID: 16239725). Binding to polygalacturonic acid has been shown for a Yersinia member (PMID: 17292916). Binding to LacNAc (β-D-galactosyl-1,4-β-D-N-acetylglucosamine) has been shown for an N-acetylglucosaminidase from Clostridium perfingens (PMID: 16990278).	0.000632826	0.000679283	0.000429331	0.00163752	0.00122187	0.000209969	0.000534699	0.000587102	0.00146826	0.000990278	0.000896347	0.00179073	0.000386427	5.58155e-05	4.60455e-05	0.00112867	0.00104221	0.00127501	0.00148911	0.000428693
CBM34	Modules of approx. 120 residues. Granular starch-binding function has been demonstrated in the case of Thermoactinomyces vulgaris R-47 Î±-amylase 1 (TVAI).	0.000155399	0.000144619	3.70179e-05	0.000188291	0.000150346	0.000111339	6.98174e-05	0.000143804	0.00022499	8.75967e-05	0.000291746	0.000140523	8.36649e-05	4.21861e-05	4.84893e-05	0.000323176	0.000285005	0.000161467	0.000172524	0.000130236
CBM35	Modules of approx. 130 residues. A module that is conserved in three Cellvibrio xylan-degrading enzymes binds to xylan and the interaction is calcium dependent, while a module from a Cellvibrio mannanase binds to decorated soluble mannans and mannooligosaccharides. A module in a Phanerochaete chrysosporium galactan 1,3-β-galactosidase binds to β-galactan.	5.96036e-05	6.70007e-05	4.88483e-05	0.000288758	0.00011811	2.05902e-05	3.80306e-05	8.14695e-05	0.000196065	9.95481e-05	7.2248e-05	9.91999e-05	2.1962e-05	1.29803e-05	1.10612e-05	8.30275e-05	8.16947e-05	0.000209715	0.000137148	3.32373e-05
CBM36	Modules of approx. 120-130 residues displaying structural similarities to CBM6 modules. The only CBM36 currently characterised, that from Paenbacillus polymyxa xylanase 43A, shows calcium-dependent binding of xylans and xylooligosaccharides. X-ray crystallography shows that there is a direct interaction between calcium and ligand.	5.85286e-05	9.34837e-05	2.42969e-05	1.33231e-05	6.05448e-05	5.07128e-05	1.81639e-05	7.98749e-05	5.06522e-05	4.34468e-05	1.54723e-05	3.07995e-05	1.77788e-05	2.66097e-05	1.04181e-05	5.8965e-05	4.70493e-06	1.19879e-05	3.83386e-06	2.98457e-05
CBM37	Modules of approx. 100 residues, conserved in numerous R. albus polysaccharide-degrading enzymes and other proteins from this bacterium. Several members of CBM37 have been shown to exhibit rather broad binding specificity to xylan, chitin, microcrystalline and phosphoric-acid swollen cellulose, as well as more heterogeneous substrates, such as alfalfa cell walls, banana stem and wheat straw.	6.86815e-05	4.63757e-05	4.00709e-05	0.00016314	6.25765e-05	4.43578e-05	3.2922e-05	8.21943e-05	0.000207844	5.35704e-05	0.000165607	0.0001223	2.87598e-05	1.55764e-05	2.44376e-06	4.52661e-05	9.38135e-05	0.000138379	0.000422074	5.56216e-05
CBM38	The inulin-binding function has been demonstrated in the case of the cycloinulo-oligosaccharide fructanotransferase from Paenibacillus macerans (Bacillus macerans) by Lee et al. (2004) FEMS Microbiol Lett 234:105-10. (PMID:15109727).	3.94172e-06	8.05473e-06	3.18023e-06	2.719e-06	3.65707e-06	2.54199e-07	0	1.73956e-06	0	2.53088e-06	7.60505e-06	7.31487e-06	0	0	0	4.76485e-07	4.56236e-06	5.32796e-06	6.09933e-06	4.74818e-06
CBM39	Modules generally found at the N-terminus of a GH16 module (itself frequently lacking a catalytic machinery) and more seldomly in isolation. The β-1,3-glucan binding function has been demonstrated, along with binding to lipopolysaccharide and lipoteichoic acid.	0	2.0747e-06	2.28976e-06	1.0876e-06	5.41788e-07	2.54199e-07	0	7.24817e-07	0	0	6.55608e-07	5.00491e-06	0	1.94705e-06	6.43094e-07	0	2.28118e-06	1.92399e-06	3.1368e-06	0
CBM4	Modules of approx. 150 residues found in bacterial enzymes. Binding of these modules has been demonstrated with xylan, β-1,3-glucan, β-1,3-1,4-glucan, β-1,6-glucan and amorphous cellulose but not with crystalline cellulose.	1.75586e-05	2.45303e-05	8.01417e-06	0.000139757	3.60289e-05	4.32139e-06	1.87315e-05	3.98649e-05	6.11229e-05	2.19343e-05	2.30774e-05	0.000124225	2.09162e-05	0	2.57238e-06	4.08586e-05	2.78019e-05	6.40836e-05	6.91838e-05	6.10481e-06
CBM40	Modules of approx. 200 residues, found at the N-terminus of GH33 sialidases. Can also be found inserted in the β-propeller of GH33 sialidases. The sialic acid binding function has been demonstrated for the N-terminal CBM40 of Vibrio cholerae sialidase (Moustafa et al. (2004) J Biol Chem 279:40819-26) (PMID: 15226294).	6.06786e-05	4.46672e-05	3.73995e-05	0.000133775	0.00011364	2.60554e-05	7.09526e-05	4.20394e-05	0.000193316	9.33615e-05	7.9853e-05	0.000166959	4.4447e-05	9.73526e-06	1.41481e-05	7.00433e-05	6.10216e-05	0.000120915	0.000138542	5.29083e-05
CBM41	Modules of approx. 100 residues found in primarily in bacterial pullulanases. The N-terminal module from Thermotoga maritima Pul13 has been shown to bind to the α-glucans amylose, amylopectin, pullulan, and oligosaccharide fragments derived from these polysaccharides (Lammerts van Bueren et al. (2004) Biochemistry 43:15633-42) (PMID: 15581376).	8.71957e-06	3.41716e-06	0	5.38362e-05	8.6686e-06	4.82979e-06	1.75963e-05	2.31942e-06	4.18829e-06	8.9987e-06	6.46429e-05	2.55379e-05	4.70615e-06	1.03843e-05	1.94214e-05	0.000144732	0.000113916	1.34679e-05	4.7749e-05	1.9671e-05
CBM42	Modules of approx. 160 residues found mostly at the C-terminus of GH54 catalytic domains. Binding to arabinofuranose (present in arabinoxylan) has been demonstrated.	0	0	0	2.719e-06	5.41788e-07	0	0	1.44963e-07	0	0	3.0158e-06	0	0	0	0	0	0	1.18399e-06	0	0
CBM43	Modules of approx. 90-100 residues found at the C-terminus of GH17 or GH72 enzymatic modules and also sometimes isolated. CBM43 modules sometimes carry a C-terminal membrane anchor. The β-1,3-glucan binding function has been demonstrated with the olive pollen protein Ole e 10.	0	1.01294e-05	1.75549e-05	5.30205e-06	5.41788e-07	1.271e-06	0	4.78379e-06	0	0	3.93365e-07	3.46494e-06	0	0	6.43094e-07	0	0	0	0	0
CBM44	The C-terminal CBM44 module of the Clostridium thermocellum enzyme has been demonstrated to bind equally well cellulose and xyloglucan	1.92308e-05	1.73299e-05	2.45514e-05	3.16764e-05	3.76542e-05	1.7794e-06	6.81145e-06	1.81204e-05	6.54421e-07	1.84192e-05	2.22907e-05	8.93185e-05	5.22906e-06	0	1.92928e-06	3.57364e-06	3.07959e-05	7.45915e-05	1.37671e-05	4.74818e-06
CBM45	Modules of approx. 100 residues, found at the N-terminus of plastidial α-amylases and of α-glucan, water dikinases. Starch-binding activity demonstrated in the case of potato α-glucan, water dikinase.	0	0	0	2.719e-07	0	0	0	4.3489e-07	0	2.81209e-07	0	0	0	0	0	0	1.45425e-05	0	0	0
CBM46	Modules of approx. 100 residues, found at the C-terminus of several GH5 cellulases. Cellulose-binding function demonstrated in one case.	1.54086e-05	1.4767e-05	2.67139e-06	8.02106e-06	2.49222e-05	9.27828e-06	1.02172e-05	4.05898e-06	5.91597e-05	9.84232e-06	1.54723e-05	3.05428e-05	2.66682e-05	0	1.54343e-06	1.95359e-05	2.92276e-05	2.85638e-05	3.71188e-05	1.01747e-05
CBM47	Modules of approx 150 residues. Fucose-binding activity demonstrated	3.70283e-06	4.51553e-06	5.82618e-05	3.67065e-06	5.95966e-06	9.06221e-05	5.10859e-06	3.01524e-05	2.23812e-05	4.8368e-05	1.04897e-05	7.57154e-06	2.14391e-05	0	6.94542e-05	2.4539e-05	9.98016e-07	8.87994e-06	3.7293e-05	1.01747e-05
CBM48	Modules of approx. 100 residues with glycogen-binding function, appended to GH13 modules. Also found in the beta subunit (glycogen-binding) of AMP-activated protein kinases (AMPK)	0.000603322	0.000560414	0.000133442	0.000647259	0.000498986	0.00031991	0.000191856	0.000453591	0.000579293	0.000449372	0.000710941	0.000414638	0.000180403	0.000131101	7.15121e-05	0.000603945	0.000586406	0.000671175	0.000556259	0.000252332
CBM49	Modules of approx. 100 residues found at the C-terminus of plant GH9 enzymes. Distantly related to CBM2 modules. Binding to crystalline cellulose demonstrated in the case of Solanum lycopersicum Cel8 enzyme (SlCel9C1).	0	0	0	0	0	8.89698e-07	0	0	0	0	0	6.41656e-07	0	0	0	0	0	0	1.74267e-06	0
CBM5	Modules of approx. 60 residues found in bacterial enzymes. Chitin-binding described in several cases. Distantly related to the CBM12 family.	1.94697e-05	1.63536e-05	5.02476e-05	2.37913e-05	0.000206556	2.07173e-05	1.02172e-05	5.76954e-05	3.23284e-05	1.65913e-05	1.8357e-05	5.03058e-05	1.04581e-06	3.24509e-06	2.9711e-05	2.17992e-05	1.36871e-05	2.97478e-05	2.49201e-05	0
CBM50	Modules of approx. 50 residues found attached to various enzymes from families GH18, GH19, GH23, GH24, GH25 and GH73, i.e. enzymes cleaving either chitin or peptidoglycan. Binding to chitopentaose demonstrated in the case of Pteris ryukyuensis chitinase A [Ohnuma T et al. (2008) J. Biol. Chem. 283:5178-87 (PMID: 18083709)]. CBM50 modules are also found in a multitude of other enzymes targeting th…	0.00114573	0.00105371	0.00156391	0.00111017	0.00136476	0.00139517	0.000343978	0.00110694	0.000857684	0.0012795	0.00109867	0.000886896	0.00030956	0.000249223	0.00151526	0.00106399	0.00137056	0.00113175	0.0010761	0.000633543
CBM51	Modules of approx. 150 residues found attached to various enzymes from families GH2, GH27, GH31, GH95, GH98 and GH101 . Binding to galactose and to blood group A/B-antigens demonstrated in the case of C. perfringens GH95CBM51 and GH98CBM51 respectively [Gregg KJ et al. (2008) J. Biol. Chem. 283:12604-13 PMID: 18292090].	4.38367e-05	3.77108e-05	4.69402e-05	0.000105905	5.37724e-05	2.66909e-05	4.9383e-05	4.10247e-05	0.000246062	3.6276e-05	5.96603e-05	0.000128716	1.83017e-05	7.78821e-06	1.41481e-06	6.03945e-05	7.9271e-05	7.91795e-05	9.82863e-05	2.50975e-05
CBM52	Modules of approx. 60 residues attached to a few GH81 enzymes but present in other proteins. Binding to β-1,3-glucan demonstrated for Schizosaccharomyces pombe 972h- endo-1,3-β-glucanase Eng1 [Martin-Quadrado et al., Mol. Microbiol. (2008) 69:188-200 PMID:18466295]	0	0	0	0	0	0	0	0	0	0	0	0	9.41231e-06	0	0	0	0	1.18399e-06	0	0
CBM53	Starch-binding function demonstrated by Valdez et al. (2008) [PMID: 18260645]	0	1.4645e-06	0	0	0	2.41489e-06	0	0	0	5.62418e-07	0	0	0	0	2.57238e-07	0	0	0	0	0
CBM54	Binding to xylan, yeast cell wall glucan and chitin shown in Dvortsov et al., Microbiology UK (2009) in press.	2.31726e-05	3.57581e-05	8.76471e-05	2.09363e-05	1.36801e-05	4.06719e-05	9.64956e-06	1.24669e-05	2.13341e-05	3.0933e-05	3.05513e-05	4.45309e-05	4.81073e-05	7.78821e-06	4.32159e-05	2.47772e-05	4.17741e-05	4.64717e-05	1.307e-05	8.13974e-06
CBM56	β-1,3-glucan binding function demonstrated by Yamamoto et al. (1998) FEBS Letters 433:41-43 [PMID: 9738929]	3.7745e-05	1.61095e-05	5.46999e-06	5.91383e-05	8.56024e-05	3.68589e-06	1.30553e-05	4.31991e-05	6.40024e-05	7.84574e-05	2.77978e-05	1.88647e-05	1.15039e-05	0	3.85857e-07	1.2746e-05	3.07959e-05	7.07435e-05	5.41969e-05	1.69578e-05
CBM57	Created from reading Schallus et al (2008) Mol Biol Cell. 19:3404-3414 [PMID: 18524852] and finding related domains attached to various glycosidases.	1.75586e-05	1.96487e-05	3.94348e-06	2.70541e-05	1.1513e-05	2.45302e-05	2.8381e-06	1.05823e-05	1.76694e-05	1.84192e-05	7.8673e-06	2.72062e-05	5.75196e-06	0	5.91647e-06	1.25077e-05	1.75366e-05	2.16079e-05	2.0912e-05	6.78312e-06
CBM58	The CBM58 module of the Bacteroides thetaiotaomicron SusG protein has been shown to bind maltoheptaose	9.55569e-07	0	0	2.719e-06	0	0	1.70286e-06	2.31942e-06	0	0	2.62243e-07	0	1.04581e-06	0	0	2.2633e-06	4.70493e-06	0	1.74267e-06	0
CBM59	Binding to mannan, xylan, and cellulose demonstrated for the CBM59 of ManF-X10 xylanase from an environmental genomic DNA library (Li et al. (2009) World Journal of Microbiology and Biotechnology 25:2071-2078; doi:10.1007/s11274-009-0111-6)	0	0	1.3993e-06	0	4.06341e-07	5.08399e-07	0	0	0	0	2.62243e-07	0	0	0	0	0	7.12869e-07	0	1.02817e-05	0
CBM6	Modules of approx. 120 residues. The cellulose-binding function has been demonstrated in one case on amorphous cellulose and β-1,4-xylan. Some of these modules also bind β-1,3-glucan, β-1,3-1,4-glucan, and β-1,4-glucan.	2.5442e-05	4.00296e-05	1.42474e-05	0.00010373	5.03862e-05	3.71131e-05	1.30553e-05	4.78379e-05	0.000101697	5.31485e-05	6.05782e-05	0.000129358	1.62101e-05	0	1.02895e-06	5.51532e-05	4.73345e-05	6.27516e-05	6.06447e-05	1.89927e-05
CBM60	Modules of approx 120 residues usually found appended to xylanases. The xylan-binding function and the relatedness (circular permutation) to family CBM36 has been demonstrated [PMID: 20659893].	0	0	6.36046e-07	2.719e-07	2.43804e-06	0	0	1.44963e-07	0	0	0	0	0	0	0	0	0	3.69997e-06	1.91693e-06	0
CBM61	Modules of approx. 150 residues found appended to GH16, GH30, GH31, GH43, GH53 and GH66 catalytic domains. A β-1,4-galactan binding function has been demonstrated for the CBM61 of Thermotoga maritima GH53 galactanase [PMID: 20826814].	1.19446e-05	1.25703e-05	8.90464e-06	0.000116509	2.46513e-05	3.17749e-06	5.67621e-06	2.13096e-05	6.93686e-05	1.58883e-05	2.42575e-05	4.05526e-05	1.04581e-06	2.59607e-06	3.47271e-06	4.76485e-05	1.28316e-05	4.39557e-05	8.48678e-05	9.49637e-06
CBM62	The CBM62 module of Clostridium thermocellum Cthe_2193 protein binds galactose moieties found on xyloglucan, arabinogalactan and galactomannan.	2.96226e-05	3.02663e-05	1.55195e-05	0.000111343	6.7588e-05	4.44849e-06	1.24877e-05	2.79779e-05	7.32951e-06	3.59948e-05	3.51406e-05	6.90421e-05	1.83017e-05	3.8941e-06	2.57238e-07	1.81064e-05	7.96987e-05	8.76154e-05	5.5591e-05	1.15313e-05
CBM63	The CBM63 module of Bacillus subtilis expansin EXLX1 has been shown to bind cellulose.	2.38892e-07	0	0	1.0876e-06	0	0	0	3.62409e-06	0	0	0	2.56662e-07	0	0	0	0	0	0	4.1824e-06	0
CBM64	Module found at C-term of several Spirochaeta thermophila proteins. Binding to cellulose shown by Angelov, Loderer, Pompei & Liebl (2011) AEM, 77:5483-5489 [PMID - 21685171]	0	0	0	1.19636e-05	8.12681e-07	0	0	0	0	1.40605e-07	0	1.53997e-06	0	3.24509e-06	0	0	0	0	1.21987e-06	0
CBM65	CBM65A and CBM65B, derived from Eubacterium cellulosolvens endoglucanase EcCel5A, bind to a range of β-glucans but, uniquely, display significant preference for xyloglucan	0	0	0	1.22355e-06	2.70894e-07	0	0	5.79854e-07	1.04707e-06	0	5.11374e-06	2.43829e-06	0	0	0	0	1.56831e-06	1.08039e-05	1.41156e-05	0
CBM66	The CBM66 module, derived from the Bacillus subtilis exo-acting β-fructosidase SacC, targets the terminal fructoside residue of fructans.	7.72817e-05	7.67641e-05	3.01486e-05	0.000228532	9.34583e-05	7.67682e-05	3.17868e-05	8.91525e-05	7.82687e-05	6.83338e-05	0.000179505	0.000159516	1.25497e-05	1.03843e-05	2.93251e-05	0.000154024	0.000274597	0.000138527	7.72001e-05	3.0524e-05
CBM67	Fujimoto et al. [PMID : 23486481] disclosed the L-rhamnose binding activity and 3-D structure of the CBM67 of Streptomyces avermitilis α-L-rhamnosidase (SaRha78A);	9.85431e-05	0.000102027	9.4898e-05	0.000395615	0.000172018	7.07945e-05	3.91658e-05	0.000157285	0.000150909	9.92669e-05	0.000341178	0.000232536	6.90236e-05	1.29803e-06	6.61101e-05	8.63629e-05	0.000230827	0.000209567	0.000231077	4.74818e-05
CBM68	Binding to maltotriose and maltotetraose shown for the pullulanase of Anoxybacillus sp. LM18-11. Binding function derived from crystal structure and deletion of the CBM, which showed reduced specific activity and increased Km value compared to the wild type enzyme.	5.25563e-06	2.0747e-06	2.54418e-07	1.04682e-05	8.12681e-07	1.0168e-06	1.70286e-06	1.5946e-06	1.49208e-05	3.79632e-06	1.35055e-05	1.00098e-05	0	0	0	0	6.13067e-06	1.22839e-05	7.84199e-06	0
CBM69	starch-binding function demonstrated in one case; distantly related to families CBM20 and CBM48	9.43625e-06	2.56287e-06	3.43465e-06	3.88817e-05	1.77435e-05	1.0168e-05	4.54097e-06	8.98773e-06	1.66223e-05	7.87386e-06	9.30963e-06	6.41656e-06	0	0	0	5.71782e-06	1.96752e-05	2.30878e-05	8.36479e-06	3.39156e-06
CBM70	The hyaluronan-specific binding function of the N-terminal CBM70 module of Streptococcus pneumoniae hyaluronate lyase has been demonstrated.	1.32585e-05	3.78328e-06	1.65372e-06	3.2628e-06	9.75218e-06	0	2.27048e-06	0	0	1.96846e-06	4.45813e-06	2.56662e-06	0	0	3.85857e-07	0	7.41383e-06	3.84797e-06	2.26546e-06	0
CBM71	The two CBM71s of S. pneumoniae BgaA bind lactose and LacNAc.	8.36123e-06	1.23262e-05	8.90464e-07	4.6223e-06	1.62536e-06	2.28779e-06	5.10859e-06	2.89927e-07	5.6542e-05	1.2795e-05	4.98262e-06	5.13324e-06	7.84359e-06	6.49017e-06	0	3.88335e-05	5.70295e-06	3.99597e-06	6.27359e-06	2.03494e-06
CBM72	Modules of 130-180 residues found at the C-terminus glycoside hydrolases from various families, sometimes as tandem repeats. The CBM72 found on an endoglucanase from an uncultivated microorganism was found to bind a broad spectrum of polysaccharides including soluble and insoluble cellulose, β-1,3/1,4-mixed linked glucans, xylan, and β-mannan [PMID=26765840].	1.07502e-06	3.90533e-06	1.65372e-06	3.67065e-06	4.46975e-06	0	0	1.15971e-06	0	1.68726e-06	6.42496e-06	1.32181e-05	6.48403e-05	0	3.85857e-07	0	5.70295e-07	6.65995e-06	1.5684e-06	1.35662e-06
CBM73	Modules of approx 65 residues found on various enzymes active of chitin. Chitin-binding function demonstrated for the Cellvibrio japonicus CjLPMO10A protein.	3.82228e-06	1.83062e-06	1.14488e-06	9.92436e-06	5.14698e-06	2.66909e-06	0	9.42262e-06	2.74857e-05	1.54665e-06	1.00964e-05	5.13324e-06	0	0	0	2.02506e-05	5.9881e-06	1.61319e-05	3.31106e-06	0
CBM74	Modules of approx. 300 residues appended to several α-amylases. The starch-binding function has been demonstrated for the CBM74 appended to the GH13 α-amylase of Microbacterium aureum B8.A	0	0	0	9.51651e-07	0	0	1.70286e-06	1.73956e-06	6.54421e-07	1.12484e-06	0	1.41164e-06	1.56872e-06	3.8941e-06	0	0	1.36871e-05	2.66398e-06	6.27359e-06	0
CBM76	Modules of approx. 170 residues appended to GH44 enzymes. So far found exclusively in Ruminococci. Broad specificity binding to β-glucans demontsrated for the R. flavefaciens module, which binds xyloglucan, glucomannan, and barley β-glucan.	3.58338e-07	4.63757e-06	2.54418e-06	1.76735e-06	1.31383e-05	0	1.70286e-06	0	2.61768e-07	3.65572e-06	5.24486e-07	1.36031e-05	8.36649e-06	0	0	3.09715e-06	4.99008e-06	3.69997e-06	4.53093e-06	2.71325e-06
CBM77	Pectin binding modules of approx. 110 residues. The Ruminococcus flavefaciens CBM77 was shown to bind various pectins of low degree of esterification.	0	1.34246e-06	0	9.65246e-06	8.39771e-06	0	0	1.73956e-06	0	1.54665e-06	0	2.56662e-07	0	0	0	0	2.7089e-06	7.39995e-07	3.6596e-06	1.35662e-06
CBM78	Modules of approx. 150 residues appended to the C-terminus of GH5 and GH26 enzymes. So far found exclusively in Ruminococcal enzymes. The R. flavefaciens module has been shown to bind decorated β-1,4-glucans with a preference for xyloglucan.	2.38892e-07	8.90902e-06	2.32793e-05	1.6314e-06	3.25073e-06	1.271e-06	0	8.69781e-06	0	6.1866e-06	3.93365e-07	2.56662e-06	0	0	3.85857e-06	0	1.99603e-06	1.92399e-06	1.48127e-05	0
CBM79	Modules of approx. 130 residues found so far only in ruminococcal proteins. Binding to various β-glucans was shown for the R. flavefaciens GH9 enzyme.	2.26948e-06	0	0	2.719e-07	0	0	0	2.89927e-07	0	0	9.17851e-07	0	0	0	0	0	0	0	6.97066e-07	0
CBM8	The cellulose-binding module from a cellulase of the slime mold Dictyostelium discoideum has been experimentally shown to bind cellulose.	0	1.22041e-07	0	0	5.41788e-07	2.54199e-07	0	1.44963e-06	5.49714e-06	8.43628e-07	2.09795e-06	1.02665e-06	1.56872e-06	0	0	2.38243e-06	0	8.87994e-07	3.48533e-07	0
CBM80	Modules of approx. 90 residues found so far only in ruminococcal enzymes of families GH5 or GH26. Broad specificity for β-glycans (xyloglucan, glucomannan, galactomannan, barley β-glucan).	1.91114e-06	0	0	4.0785e-07	0	0	0	5.79854e-07	0	2.81209e-07	9.17851e-07	0	0	0	2.57238e-07	0	0	2.95998e-07	3.48533e-07	0
CBM81	Small family of modules of approx. 100 residues, appended to GH5_2 enzymes. So far found exclusively in a few gammaproteobacteria. The CBM81 from an uncultivated species was shown to have binding affinity for β-1,4-, β-1,3,-glucans, xyloglucan, avicel and cellooligosaccharides.	0	0	0	4.0785e-07	0	0	0	0	1.57061e-06	0	0	2.56662e-07	0	0	1.54343e-06	0	0	1.21359e-05	1.5684e-06	0
CBM9	Modules of approx. 170 residues found so far only in xylanases. The cellulose-binding function has been demonstrated in one case.	4.68229e-05	3.49038e-05	2.23888e-05	0.000173744	9.00722e-05	6.35499e-06	1.92991e-05	4.45038e-05	3.848e-05	5.73667e-05	7.42148e-05	8.57252e-05	1.46414e-05	2.59607e-06	3.21547e-06	3.7285e-05	6.34453e-05	0.000118843	9.54981e-05	5.4265e-06
CE1	acetyl xylan esterase (EC 3.1.1.72); cinnamoyl esterase (EC 3.1.1.-); feruloyl esterase (EC 3.1.1.73); carboxylesterase (EC 3.1.1.1); S-formylglutathione hydrolase (EC 3.1.2.12); diacylglycerol O-acyltransferase (EC 2.3.1.20); trehalose 6-O-mycolyltransferase (EC 2.3.1.122)	0.00132406	0.00168075	0.00158401	0.00148512	0.0015185	0.00158443	0.000326382	0.00146906	0.00170765	0.00170905	0.000952861	0.000888565	0.000400023	0.000361503	0.00147873	0.00125435	0.000876971	0.00142908	0.00125176	0.000487706
CE10	arylesterase (EC 3.1.1.-); carboxyl esterase (EC 3.1.1.3); acetylcholinesterase (EC 3.1.1.7); cholinesterase (EC 3.1.1.8); sterol esterase (EC 3.1.1.13); brefeldin A esterase (EC 3.1.1.-).	0.000779028	0.0010055	0.00129206	0.00124231	0.00100122	0.00122232	0.000295731	0.00104997	0.000781902	0.00111738	0.00112922	0.000711853	0.000223804	0.00019795	0.00142484	0.00135131	0.00128915	0.000876006	0.000606447	0.000521622
CE11	UDP-3-0-acyl N-acetylglucosamine deacetylase (EC 3.5.1.-).	0.000110129	0.000128143	0.000248694	0.000133231	0.000137885	0.000218739	2.78134e-05	0.00017961	3.63858e-05	0.000244371	5.79557e-05	7.07104e-05	1.98704e-05	2.66097e-05	0.000146111	5.95607e-05	9.50967e-05	0.000109519	7.85942e-05	3.66288e-05
CE12	pectin acetylesterase (EC 3.1.1.-); rhamnogalacturonan acetylesterase (EC 3.1.1.-); acetyl xylan esterase (EC 3.1.1.72)	6.55759e-05	7.77404e-05	2.37881e-05	0.000191962	9.46774e-05	2.26238e-05	4.48421e-05	6.52335e-05	0.000139784	6.01788e-05	0.000160099	0.000190572	2.87598e-05	2.59607e-06	4.60455e-05	0.000383928	0.00027645	0.000137787	0.000152657	7.05444e-05
CE13	pectin acetylesterase (EC 3.1.1.-)	4.77785e-07	0	0	1.61781e-05	0	0	0	3.91401e-06	0	4.21814e-07	0	3.84993e-07	0	0	0	0	0	0	5.05373e-06	0
CE14	N-acetyl-1-D-myo-inosityl-2-amino-2-deoxy-α-D-glucopyranoside deacetylase (EC 3.5.1.89); diacetylchitobiose deacetylase (EC 3.5.1.-); mycothiol S-conjugate amidase (EC 3.5.1.-)	0.000170211	0.000144741	0.000144255	0.000203517	0.000197617	0.000172601	3.06515e-05	0.000153226	0.000135465	0.000234669	9.63744e-05	0.000129614	5.38593e-05	2.85568e-05	0.000163603	9.66074e-05	9.50967e-05	0.000138823	0.000144467	3.73072e-05
CE15	4-O-methyl-glucuronoyl methylesterase (EC 3.1.1.-)	2.83087e-05	3.18528e-05	9.54068e-06	8.75519e-05	2.96629e-05	8.51568e-06	3.40573e-06	2.43539e-05	0.000138606	4.44311e-05	4.93017e-05	7.04538e-05	6.27487e-06	0	8.10299e-06	2.89465e-05	7.71324e-05	5.28356e-05	7.94655e-05	1.76361e-05
CE16	acetylesterase (EC 3.1.1.6) active on various carbohydrate acetyl esters	0	1.33025e-05	2.50602e-05	1.22355e-06	0	0	0	3.04423e-06	0	3.23391e-06	0	0	0	0	5.51775e-05	0	0	0	1.21987e-06	0
CE2	acetyl xylan esterase (EC 3.1.1.72).	4.21645e-05	4.29586e-05	1.65372e-05	0.000177959	6.92134e-05	2.38947e-05	1.36229e-05	8.08896e-05	8.93939e-05	3.38857e-05	0.000154592	3.47777e-05	2.45766e-05	0	9.00332e-06	9.87516e-05	5.50335e-05	0.000121359	0.000200929	3.45939e-05
CE3	acetyl xylan esterase (EC 3.1.1.72).	0.000386408	0.000400906	0.000595847	0.000885987	0.000536776	0.000370496	0.000124309	0.000467507	0.000533353	0.00055342	0.000656788	0.000600975	0.000120268	4.28351e-05	0.000441677	0.000350693	0.000476909	0.000784395	0.000537612	0.000158725
CE4	acetyl xylan esterase (EC 3.1.1.72); chitin deacetylase (EC 3.5.1.41); chitooligosaccharide deacetylase (EC 3.5.1.-); peptidoglycan GlcNAc deacetylase (EC 3.5.1.-); peptidoglycan N-acetylmuramic acid deacetylase (EC 3.5.1.-).	0.00106474	0.00072932	0.000447649	0.000807136	0.000856972	0.000526447	0.000181071	0.000599569	0.00104917	0.000501958	0.000854257	0.000670402	0.000303285	0.000159658	0.000147397	0.000595845	0.000768615	0.00101083	0.000727563	0.00019671
CE5	acetyl xylan esterase (EC 3.1.1.72); cutinase (EC 3.1.1.74)	2.15003e-06	1.58654e-06	3.68906e-06	1.11479e-05	2.70894e-06	2.1607e-06	5.67621e-07	3.1892e-06	3.92653e-07	4.92116e-06	3.09447e-05	4.49159e-06	0	0	1.15757e-06	2.02506e-06	7.12869e-07	1.47999e-06	2.43973e-06	2.71325e-06
CE6	acetyl xylan esterase (EC 3.1.1.72).	0.000193861	0.000242618	0.000222616	0.000374679	0.000669649	0.000157222	5.16535e-05	0.000647842	0.000228786	0.000178849	0.00018357	0.000302348	7.52984e-05	2.33646e-05	2.30228e-05	0.000207271	0.000118479	0.000303694	0.000159802	7.19011e-05
CE7	acetyl xylan esterase (EC 3.1.1.72); cephalosporin-C deacetylase (EC 3.1.1.41).	0.000194817	0.000207959	0.000154177	0.000162596	0.000204796	0.00029932	7.37907e-05	0.000151777	0.000226299	0.000274179	0.00023615	0.000183513	4.70615e-05	3.5696e-05	0.000219552	0.000552723	0.000441836	0.000216967	0.000269242	0.000141767
CE8	pectin methylesterase (EC 3.1.1.11).	9.34069e-05	0.000133269	2.20072e-05	0.000178503	0.000139917	5.75762e-05	2.78134e-05	9.01673e-05	5.74582e-05	6.03194e-05	7.82796e-05	0.000118963	2.45766e-05	1.94705e-05	5.53061e-06	8.63629e-05	4.13464e-05	8.74674e-05	9.13157e-05	4.00204e-05
CE9	N-acetylglucosamine 6-phosphate deacetylase (EC 3.5.1.25); N-acetylglucosamine 6-phosphate deacetylase (EC 3.5.1.80)	0.000349858	0.000360632	8.58662e-05	0.000374271	0.000300557	0.000180609	0.000103875	0.00027949	0.000461367	0.000173365	0.000388513	0.000292852	0.000130204	7.72331e-05	4.15439e-05	0.000403226	0.000360141	0.000340694	0.000296427	0.000137019
GH1	β-glucosidase (EC 3.2.1.21); β-galactosidase (EC 3.2.1.23); β-mannosidase (EC 3.2.1.25); β-glucuronidase (EC 3.2.1.31); β-xylosidase (EC 3.2.1.37); β-D-fucosidase (EC 3.2.1.38); phlorizin hydrolase (EC 3.2.1.62); exo-β-1,4-glucanase (EC 3.2.1.74); 6-phospho-β-galactosidase (EC 3.2.1.85); 6-phospho-β-glucosidase (EC 3.2.1.86); strictosidine β-glucosidase (EC 3.2.1.105); lactase (EC 3.2.1.108); amy…	0.000283446	0.000687825	6.85657e-05	0.000402005	0.000312341	0.000314063	0.000257132	0.000184683	0.00234204	0.000195862	0.000781091	0.000452239	0.000445516	0.000143433	0.000143153	0.00230047	0.000515547	0.000287562	0.000203892	0.000363575
GH10	endo-1,4-β-xylanase (EC 3.2.1.8); endo-1,3-β-xylanase (EC 3.2.1.32); tomatinase (EC 3.2.1.-); xylan endotransglycosylase (EC 2.4.2.-)	1.19446e-05	1.7574e-05	3.68906e-06	7.45007e-05	3.58934e-05	3.17749e-06	9.64956e-06	3.62409e-05	2.51298e-05	2.24967e-05	1.10142e-05	7.58437e-05	1.0981e-05	0	9.13194e-06	1.4771e-05	1.56831e-05	2.56038e-05	7.54574e-05	6.78312e-06
GH101	endo-α-N-acetylgalactosaminidase (EC 3.2.1.97)	2.10225e-05	1.33025e-05	3.18023e-06	1.07401e-05	3.37263e-05	9.40538e-06	4.76802e-05	1.73956e-06	3.11504e-05	1.16702e-05	1.67836e-05	6.08289e-05	2.1962e-05	5.19214e-06	0	2.31095e-05	2.72316e-05	2.42718e-05	4.94917e-05	2.91674e-05
GH102	peptidoglycan lytic transglycosylase (EC 3.2.1.-)	0.000101768	9.69009e-05	2.22616e-05	2.24318e-05	7.67984e-05	4.53746e-05	1.92991e-05	7.1322e-05	2.10724e-05	4.96334e-05	2.00616e-05	1.23198e-05	2.14391e-05	3.8292e-05	5.14475e-06	4.10968e-05	3.70692e-06	1.89439e-05	4.7052e-06	3.39156e-05
GH103	peptidoglycan lytic transglycosylase (EC 3.2.1.-)	5.85286e-05	9.60466e-05	0.000496879	4.0785e-06	7.38186e-05	0.000335797	1.75963e-05	0.000180624	1.93709e-05	0.000207392	1.20632e-05	1.41164e-05	1.77788e-05	3.11528e-05	0.000678464	3.87144e-05	1.28316e-06	8.87994e-06	1.5684e-06	2.10277e-05
GH104	peptidoglycan lytic transglycosylase (EC 3.2.1.-)	0.000106427	2.44083e-07	8.9428e-05	5.03015e-06	7.32768e-05	6.64732e-05	9.64956e-06	0.00015801	2.25121e-05	6.10224e-05	4.58926e-06	2.14313e-05	0	1.29803e-06	7.8972e-05	3.94292e-05	5.70295e-07	8.87994e-06	1.65553e-05	5.62999e-05
GH105	unsaturated rhamnogalacturonyl hydrolase (EC 3.2.1.172); d-4,5-unsaturated β-glucuronyl hydrolase (EC 3.2.1.-); d-4,5-unsaturated α-galacturonidase (EC 3.2.1.-)	0.000101888	0.000113132	3.93076e-05	0.000231931	0.000237574	2.13528e-05	3.23544e-05	9.97348e-05	0.000239518	7.21302e-05	0.000125746	0.000231894	4.13096e-05	2.59607e-06	1.53056e-05	0.000132463	0.000134304	0.000199207	0.00017113	5.76565e-05
GH106	α-L-rhamnosidase (EC 3.2.1.40); rhamnogalacturonan α-L-rhamnohydrolase (EC 3.2.1.174)	5.31535e-05	4.29586e-05	1.69188e-05	0.00019033	7.80174e-05	1.57604e-05	1.53258e-05	9.24867e-05	5.7589e-05	4.47123e-05	0.000224742	0.000101253	1.41185e-05	3.24509e-06	1.92928e-06	0.000100538	0.000118194	0.000162355	0.000109962	1.89927e-05
GH108	N-acetylmuramidase (EC 3.2.1.17)	7.36983e-05	2.85577e-05	3.44737e-05	2.41991e-05	1.40865e-05	7.00319e-05	4.08687e-05	6.50886e-05	7.40805e-05	5.93351e-05	3.29115e-05	0.000186722	0.000120268	0.000101247	9.37631e-05	5.40811e-05	1.65386e-05	8.50994e-05	8.88759e-06	6.85095e-05
GH109	α-N-acetylgalactosaminidase (EC 3.2.1.49)	0.000771622	0.0010393	0.000350461	0.00111724	0.000874851	0.00052632	0.000286649	0.000794545	0.00214375	0.000627659	0.00140838	0.000810924	0.000426168	0.000163552	0.00019087	0.00117049	0.00104293	0.00115099	0.00100378	0.000386638
GH11	endo-β-1,4-xylanase (EC 3.2.1.8); endo-β-1,3-xylanase (EC 3.2.1.32)	7.28621e-06	5.73595e-06	5.08836e-07	1.0876e-05	7.99137e-06	1.0168e-06	0	2.02949e-06	8.50747e-06	8.43628e-07	5.76935e-06	1.92497e-06	0	0	0	7.14728e-07	0	1.83519e-05	5.228e-07	0
GH110	α-galactosidase (EC 3.2.1.22); α-1,3-galactosidase (EC 3.2.1.-)	4.16867e-05	7.0662e-05	4.38871e-05	0.000150225	9.90117e-05	1.42352e-05	2.21372e-05	6.43638e-05	9.0441e-05	0.000103907	8.8376e-05	8.59818e-05	2.56224e-05	2.59607e-06	1.80066e-06	6.00371e-05	7.49938e-05	0.000152587	7.73743e-05	1.0853e-05
GH111	keratan sulfate hydrolase (endo-β-N-acetylglucosaminidase) (EC 3.2.1.-)	2.38892e-07	0	0	2.1752e-06	0	0	0	2.89927e-07	0	0	0	0	0	0	0	0	0	0	0	0
GH112	lacto-N-biose phosphorylase or galacto-N-biose phosphorylase (EC 2.4.1.211); D-galactosyl-β-1,4-L-rhamnose phosphorylase (EC 2.4.1.247); galacto-N-biose/lacto-N-biose phosphorylase (EC 2.4.1.-)	0.000166388	7.63979e-05	1.32297e-05	6.74313e-05	5.98675e-05	7.13029e-05	3.17868e-05	2.63833e-05	0.000212425	3.75414e-05	0.000145152	8.95751e-05	3.13744e-05	8.43722e-06	1.15757e-06	7.1711e-05	9.36709e-05	0.000142967	9.18385e-05	3.93421e-05
GH113	β-mannanase (EC 3.2.1.78)	0	2.56287e-06	3.81627e-07	1.12839e-05	2.70894e-06	1.32184e-05	0	4.3489e-06	2.74857e-06	3.0933e-06	1.78325e-05	4.1066e-06	2.09162e-06	0	2.57238e-07	0	2.7089e-06	1.77599e-06	3.1368e-06	1.0853e-05
GH114	endo-α-1,4-polygalactosaminidase (EC 3.2.1.109)	6.34259e-05	0.000101538	2.4933e-05	2.1752e-06	6.56917e-05	4.82979e-05	1.87315e-05	8.94424e-05	2.15959e-05	4.86492e-05	1.0752e-05	1.47581e-05	1.51643e-05	2.53117e-05	4.88752e-06	3.84762e-05	2.42375e-06	1.15439e-05	5.05373e-06	2.91674e-05
GH115	xylan α-1,2-glucuronidase (3.2.1.131); α-(4-O-methyl)-glucuronidase (3.2.1.-)	2.41281e-05	4.00296e-05	5.72441e-06	0.000119636	4.49684e-05	4.70269e-06	8.51431e-06	3.00074e-05	1.5837e-05	2.33404e-05	3.29115e-05	0.000125636	1.0981e-05	0	2.31514e-06	3.91909e-05	1.59683e-05	5.26876e-05	3.88614e-05	8.81806e-06
GH116	β-glucosidase (EC 3.2.1.21); β-xylosidase (EC 3.2.1.37); acid β-glucosidase/β-glucosylceramidase (EC 3.2.1.45); β-N-acetylglucosaminidase (EC 3.2.1.52)	1.4453e-05	1.85503e-05	4.57953e-06	5.03015e-05	2.19424e-05	1.3981e-06	2.8381e-06	6.08846e-06	7.59128e-06	8.57688e-06	1.63902e-05	6.41656e-06	1.56872e-06	0	0	1.20313e-05	3.26494e-05	3.80357e-05	2.40488e-05	5.4265e-06
GH117	α-1,3-L-neoagarooligosaccharide hydrolase (EC 3.2.1.-); α-1,3-L-neoagarobiase / neoagarobiose hydrolase (EC 3.2.1.-)	5.61397e-06	1.52552e-05	7.63255e-07	4.86701e-05	1.35447e-05	3.81299e-06	1.70286e-06	6.81328e-06	5.23537e-07	2.53088e-06	7.60505e-06	2.29713e-05	0	0	7.71713e-07	1.06018e-05	1.89623e-05	1.12479e-05	1.37671e-05	4.06987e-06
GH119	α-amylase (EC 3.2.1.1)	0	0	0	2.719e-07	0	0	0	0	0	4.21814e-07	0	0	0	0	0	0	1.45425e-05	2.51598e-06	0	0
GH12	endoglucanase (EC 3.2.1.4); xyloglucan hydrolase (EC 3.2.1.151); β-1,3-1,4-glucanase (EC 3.2.1.73); xyloglucan endotransglycosylase (EC 2.4.1.207)	5.97231e-07	0	1.52651e-06	1.22355e-06	0	0	0	2.89927e-07	0	0	2.62243e-07	0	0	0	3.85857e-07	3.09715e-06	2.05306e-05	1.18399e-06	0	0
GH120	β-xylosidase (EC 3.2.1.37)	6.80843e-06	1.37907e-05	5.34278e-06	1.78095e-05	1.92335e-05	1.57604e-05	2.8381e-06	2.04398e-05	3.12813e-05	1.61695e-05	4.03855e-05	2.15596e-05	5.22906e-06	0	9.00332e-06	6.90904e-06	1.46851e-05	1.58359e-05	1.08045e-05	6.78312e-06
GH121	β-L-arabinobiosidase (EC 3.2.1.-)	4.77785e-07	0	0	2.719e-07	9.48128e-07	0	0	2.89927e-07	3.92653e-07	5.06177e-06	0	0	0	0	2.57238e-06	0	0	0	4.87946e-06	0
GH123	β-N-acetylgalactosaminidase (EC 3.2.1.53); glycosphingolipid β-N-acetylgalactosaminidase (EC 3.2.1.-)	5.35119e-05	7.3591e-05	3.51097e-05	0.000161509	0.00011662	1.0168e-05	3.97335e-05	6.18994e-05	0.000144103	9.2799e-05	0.000116305	0.000174145	2.1962e-05	1.29803e-05	2.57238e-06	9.5297e-05	6.23047e-05	0.000179079	0.000153703	3.0524e-05
GH124	endoglucanase (EC 3.2.1.4)	1.19446e-06	0	0	5.438e-07	0	0	1.13524e-06	2.31942e-06	0	0	6.55608e-07	0	0	0	0	0	4.27721e-07	0	1.21987e-06	0
GH125	exo-α-1,6-mannosidase (EC 3.2.1.-)	3.73866e-05	5.46746e-05	2.03535e-05	0.000130376	5.94612e-05	6.48209e-06	2.27048e-05	5.39264e-05	7.39496e-05	6.98805e-05	8.74581e-05	0.000135133	2.03933e-05	8.43722e-06	6.55956e-06	8.94601e-05	7.81304e-05	7.76995e-05	5.50682e-05	1.35662e-05
GH126	α-amylase (EC 3.2.1.-)	4.6584e-06	7.32249e-07	0	1.3595e-07	3.52162e-06	3.81299e-07	6.81145e-06	4.3489e-07	2.4868e-06	0	2.49131e-06	1.47581e-05	5.75196e-06	5.84116e-06	0	5.24134e-06	2.85147e-07	5.17996e-06	0	2.03494e-06
GH127	β-L-arabinofuranosidase (EC 3.2.1.185); 3-C-carboxy-5-deoxy-L-xylose (aceric acid) hydrolase (EC 3.2.1.-)	7.08316e-05	9.29956e-05	4.52864e-05	0.000205964	0.00013951	8.18522e-05	4.03011e-05	0.000187438	0.000238733	8.59094e-05	0.000135449	0.000213415	5.69967e-05	1.94705e-06	1.13185e-05	0.000202625	0.00013017	0.000203647	0.000154749	3.45939e-05
GH128	β-1,3-glucanase (EC 3.2.1.39)	7.16677e-07	5.73595e-06	6.36046e-07	9.51651e-07	0	2.54199e-07	0	9.42262e-06	4.33227e-05	8.15507e-06	1.18009e-06	8.98318e-07	4.18325e-06	0	2.57238e-07	2.65641e-05	0	6.65995e-06	5.40226e-06	0
GH129	α-N-acetylgalactosaminidase (EC 3.2.1.49);	2.86671e-06	4.14941e-06	7.63255e-07	2.1752e-05	1.81499e-05	3.30459e-06	0	6.66832e-06	1.88473e-05	4.63995e-06	5.06129e-05	1.50147e-05	0	2.59607e-06	0	1.84638e-05	8.26928e-06	2.35318e-05	1.21987e-05	5.4265e-06
GH13	α-amylase (EC 3.2.1.1); pullulanase (EC 3.2.1.41); cyclomaltodextrin glucanotransferase (EC 2.4.1.19); cyclomaltodextrinase (EC 3.2.1.54); trehalose-6-phosphate hydrolase (EC 3.2.1.93); oligo-α-glucosidase (EC 3.2.1.10); maltogenic amylase (EC 3.2.1.133); neopullulanase (EC 3.2.1.135); α-glucosidase (EC 3.2.1.20); maltotetraose-forming α-amylase (EC 3.2.1.60); isoamylase (EC 3.2.1.68); glucodextr…	0.00152831	0.00150001	0.000421062	0.00182024	0.00136869	0.000856017	0.0015638	0.00141455	0.00178657	0.0010925	0.00216469	0.00283419	0.000496761	0.000306336	0.000294151	0.00217075	0.00187456	0.00178664	0.00184653	0.000820757
GH130	β-1,4-mannosylglucose phosphorylase (EC 2.4.1.281); β-1,4-mannooligosaccharide phosphorylase (EC 2.4.1.319); β-1,4-mannosyl-N-acetyl-glucosamine phosphorylase (EC 2.4.1.320); β-1,2-mannobiose phosphorylase (EC 2.4.1.-); β-1,2-oligomannan phosphorylase (EC 2.4.1.-); β-1,2-mannosidase (EC 3.2.1.-)	4.67034e-05	6.54142e-05	2.62051e-05	0.000262792	0.00012583	4.56288e-05	1.53258e-05	7.48011e-05	5.02595e-05	0.000107	0.000129155	0.0002138	1.41185e-05	5.84116e-06	3.85857e-07	3.29966e-05	7.21423e-05	0.000144743	9.4801e-05	3.73072e-05
GH131	broad specificity exo-β-1,3/1,6-glucanase with endo-β-1,4-glucanase activity (EC 3.2.1.-);	0	0	0	4.0785e-07	0	0	0	0	0	0	0	0	0	0	0	0	0	0	3.31106e-06	0
GH133	amylo-α-1,6-glucosidase (EC 3.2.1.33);	5.84092e-05	2.46524e-05	3.01486e-05	0.000211674	8.19454e-05	1.62688e-05	1.6461e-05	6.11746e-05	3.87417e-05	0.000108406	0.000116174	7.41754e-05	2.30079e-05	7.78821e-06	6.43094e-07	2.60876e-05	0.000136586	0.000161467	0.000128783	3.2559e-05
GH134	endo-β-1,4-mannanase (EC 3.2.1.78);	0	4.14941e-06	0	0	4.06341e-07	0	0	0	0	0	0	0	0	0	0	0	0	0	0	0
GH135	α-1,4-galactosaminogalactan hydrolase (EC 3.2.1.-)	0	0	3.30744e-06	0	0	0	0	5.79854e-07	0	0	5.24486e-07	3.07995e-06	0	0	1.02895e-06	8.57673e-06	4.27721e-07	0	0	0
GH136	lacto-N-biosidase (EC 3.2.1.140)	2.15003e-05	1.59874e-05	5.97883e-06	4.21445e-05	4.06341e-05	8.26148e-06	4.71125e-05	1.15971e-05	0.000123686	2.22155e-05	2.2684e-05	5.12041e-05	3.39889e-05	3.8941e-06	9.00332e-07	3.79997e-05	4.50533e-05	4.69157e-05	0.000101772	2.98457e-05
GH137	β-L-arabinofuranosidase (EC 3.2.1.185)	8.48068e-06	1.15939e-05	2.16255e-06	1.645e-05	1.09712e-05	2.0336e-06	2.27048e-06	1.02924e-05	7.19863e-06	6.74902e-06	8.91627e-06	2.59229e-05	6.79778e-06	0	6.43094e-07	1.26269e-05	5.9881e-06	1.86479e-05	1.93436e-05	1.35662e-06
GH138	α-galacturonidase (EC 3.2.1.-)	6.68898e-06	8.5429e-06	8.90464e-07	1.50905e-05	5.82422e-06	1.7794e-06	5.67621e-07	5.36365e-06	7.19863e-06	2.53088e-06	3.80253e-06	2.00197e-05	1.04581e-06	0	0	8.21937e-06	8.55442e-07	1.37639e-05	7.66773e-06	2.03494e-06
GH139	α-2-O-Me-L-fucosidase (EC 3.2.1.-)	1.08696e-05	1.14719e-05	8.90464e-07	1.82173e-05	1.04294e-05	2.54199e-06	2.27048e-06	6.81328e-06	6.54421e-06	4.78056e-06	5.37599e-06	2.19446e-05	1.56872e-06	0	1.28619e-07	9.64883e-06	8.41185e-06	1.89439e-05	1.81237e-05	1.35662e-06
GH14	β-amylase (EC 3.2.1.2)	0	0	0	5.438e-07	0	0	0	0	0	0	0	0	0	0	0	0	0	0	0	0
GH140	apiosidase (EC 3.2.1.-)	2.25753e-05	2.89238e-05	7.88697e-06	5.88664e-05	2.53286e-05	7.11758e-06	1.81639e-05	2.24693e-05	0.000132586	1.3498e-05	3.85497e-05	3.8371e-05	4.07867e-05	0	1.15757e-06	7.94539e-05	5.27523e-06	6.00876e-05	3.52018e-05	3.18807e-05
GH141	α-L-fucosidase (EC 3.2.1.51); xylanase (EC 3.2.1.8)	2.6517e-05	3.42936e-05	1.81909e-05	0.000101147	2.57349e-05	1.06764e-05	9.08194e-06	2.87028e-05	1.29575e-05	2.96676e-05	2.03238e-05	6.91705e-05	5.75196e-06	0	3.85857e-07	2.76361e-05	1.39722e-05	5.17996e-05	3.64217e-05	7.46143e-06
GH142	β-L-arabinofuranosidase (EC 3.2.1.185)	6.45009e-06	1.28143e-05	2.7986e-06	3.8202e-05	1.09712e-05	1.5252e-06	9.08194e-06	1.07273e-05	3.9527e-05	5.34298e-06	7.08057e-06	3.11845e-05	2.35308e-05	0	5.14475e-07	1.19121e-05	2.39524e-05	2.50118e-05	7.84199e-06	8.81806e-06
GH143	2-keto-3-deoxy-D-lyxo-heptulosaric acid hydrolase (EC 3.2.1.-)	7.52511e-06	1.12278e-05	1.14488e-06	1.25074e-05	6.23056e-06	1.5252e-06	2.27048e-06	5.79854e-06	7.4604e-06	2.9527e-06	3.27804e-06	2.25863e-05	1.56872e-06	0	2.57238e-07	8.9341e-06	1.85346e-06	1.50959e-05	9.06186e-06	1.35662e-06
GH144	endo-β-1,2-glucanase (EC 3.2.1.71)	2.13809e-05	2.33099e-05	1.93358e-05	2.89574e-05	5.05217e-05	3.30459e-06	4.54097e-06	2.44988e-05	2.61768e-07	2.58712e-05	2.53065e-05	5.82623e-05	1.0981e-05	0	3.85857e-07	2.48964e-05	5.14691e-05	3.50758e-05	1.27215e-05	7.46143e-06
GH145	L-Rhα-α-1,4-GlcA α-L-rhamnohydrolase (EC 3.2.1.-)	1.11085e-05	1.61095e-05	5.08836e-06	2.54227e-05	1.16484e-05	4.19429e-06	1.13524e-06	8.69781e-06	7.32951e-06	7.45204e-06	7.21169e-06	3.11845e-05	2.61453e-06	0	0	1.31033e-05	5.9881e-06	2.53078e-05	1.46384e-05	3.39156e-06
GH15	glucoamylase (EC 3.2.1.3); glucodextranase (EC 3.2.1.70); α,α-trehalase (EC 3.2.1.28); dextran dextrinase (EC 2.4.1.2)	9.73486e-05	0.00012912	3.19295e-05	3.43954e-05	8.99367e-05	6.86338e-05	1.87315e-05	7.9295e-05	7.57819e-05	4.55559e-05	3.10758e-05	2.57946e-05	2.66682e-05	3.37489e-05	4.7589e-06	8.07642e-05	5.50335e-05	5.10597e-05	2.6837e-05	3.93421e-05
GH16	xyloglucan:xyloglucosyltransferase (EC 2.4.1.207); keratan-sulfate endo-1,4-β-galactosidase (EC 3.2.1.103); endo-1,3-β-glucanase (EC 3.2.1.39); endo-1,3(4)-β-glucanase (EC 3.2.1.6); licheninase (EC 3.2.1.73); β-agarase (EC 3.2.1.81); κ-carrageenase (EC 3.2.1.83); xyloglucanase (EC 3.2.1.151); endo-β-1,3-galactanase (EC 3.2.1.181); β-porphyranase (EC 3.2.1.178); hyaluronidase (EC 3.2.1.35); endo-β…	5.06452e-05	0.000103613	8.90464e-05	0.000258849	9.72509e-05	1.46165e-05	3.68954e-05	0.000136121	0.000266611	0.000214984	0.000115649	0.000195577	4.39241e-05	1.94705e-06	3.21547e-06	0.000176419	0.000116055	0.000229842	9.39297e-05	2.71325e-05
GH17	glucan endo-1,3-β-glucosidase (EC 3.2.1.39); glucan 1,3-β-glucosidase (EC 3.2.1.58); licheninase (EC 3.2.1.73); ABA-specific β-glucosidase (EC 3.2.1.175); β-1,3-glucanosyltransglycosylase (EC 2.4.1.-)	0	4.88166e-06	0	6.79751e-07	2.70894e-07	0	0	4.3489e-07	0	0	0	0	0	0	0	0	0	0	0	0
GH18	chitinase (EC 3.2.1.14); lysozyme (EC 3.2.1.17); endo-β-N-acetylglucosaminidase (EC 3.2.1.96); peptidoglycan hydrolase with endo-β-N-acetylglucosaminidase specificity (EC 3.2.1.-); Nod factor hydrolase (EC 3.2.1.-); xylanase inhibitor; concanavalin B; narbonin	0.000176303	0.00016378	5.24102e-05	0.000374271	0.000236626	3.63505e-05	7.26555e-05	0.000107273	0.00017473	0.000154524	0.000261588	0.000414253	7.52984e-05	2.85568e-05	6.8168e-06	0.00010435	0.000257773	0.000265806	0.00017113	5.96914e-05
GH19	chitinase (EC 3.2.1.14); lysozyme (EC 3.2.1.17)	8.36123e-07	1.25703e-05	5.67353e-05	2.719e-06	1.48992e-06	4.30868e-05	2.8381e-06	9.27766e-06	3.01034e-06	2.92458e-05	2.62243e-06	1.00098e-05	9.93521e-05	8.76173e-05	0.000272543	4.26454e-05	1.71088e-06	1.15439e-05	1.5684e-06	1.22096e-05
GH2	β-galactosidase (EC 3.2.1.23) ; β-mannosidase (EC 3.2.1.25); β-glucuronidase (EC 3.2.1.31); α-L-arabinofuranosidase (EC 3.2.1.55); mannosylglycoprotein endo-β-mannosidase (EC 3.2.1.152); exo-β-glucosaminidase (EC 3.2.1.165); α-L-arabinopyranosidase (EC 3.2.1.-); β-galacturonidase (EC 3.2.1.-); β-xylosidase (EC 3.2.1.37)	0.000974442	0.000959124	0.000362037	0.00205625	0.00127943	0.000501154	0.000357601	0.000907471	0.00120728	0.000912524	0.00157779	0.00150237	0.000413096	0.000118121	7.97437e-05	0.00101575	0.00119291	0.00158847	0.00119303	0.00047007
GH20	β-hexosaminidase (EC 3.2.1.52); lacto-N-biosidase (EC 3.2.1.140); β-1,6-N-acetylglucosaminidase (EC 3.2.1.-); β-6-SO3-N-acetylglucosaminidase (EC 3.2.1.-)	0.00029754	0.000388458	0.000259379	0.000913041	0.000526888	9.85023e-05	0.000183342	0.000341099	0.000768159	0.000512223	0.000466006	0.000733541	0.000144845	2.85568e-05	1.49198e-05	0.000416567	0.000466501	0.000684495	0.000673889	0.000127523
GH22	lysozyme type C (EC 3.2.1.17); lysozyme type i (EC 3.2.1.17); α-lactalbumin	0	2.80695e-06	1.3993e-06	2.719e-07	3.92796e-06	0	1.13524e-06	1.30467e-06	0	2.67149e-06	2.62243e-07	1.16781e-05	6.27487e-06	0	0	2.62067e-06	1.42574e-06	1.77599e-06	1.21987e-06	0
GH23	lysozyme type G (EC 3.2.1.17); peptidoglycan lyase (EC 4.2.2.n1) also known in the literature as peptidoglycan lytic transglycosylase; chitinase (EC 3.2.1.14)	0.000820237	0.000953021	0.00138531	0.000550734	0.000937563	0.00141449	0.000263944	0.00111114	0.000789624	0.00116125	0.000465744	0.000822346	0.000265636	0.000342681	0.0012494	0.000553318	0.000377678	0.000565504	0.000290677	0.0005223
GH24	lysozyme (EC 3.2.1.17)	0.000231248	0.000274593	0.000243224	0.000226493	0.00145524	0.000267291	5.10859e-05	0.000671471	7.99702e-05	0.000371477	0.000181341	0.000101125	5.38593e-05	9.28095e-05	0.000200903	0.000498404	0.000163389	0.000310798	0.000160151	3.52722e-05
GH25	lysozyme (EC 3.2.1.17)	0.000340183	0.000296195	0.000192595	0.000419678	0.000368145	0.000368208	0.000148717	0.000323558	0.000589372	0.000276007	0.000642889	0.000410146	0.000127066	3.5696e-05	0.000267141	0.00113797	0.000978341	0.000420021	0.000451176	0.000285569
GH26	β-mannanase (EC 3.2.1.78); exo-β-1,4-mannobiohydrolase (EC 3.2.1.100); β-1,3-xylanase (EC 3.2.1.32); lichenase / endo-β-1,3-1,4-glucanase (EC 3.2.1.73); mannobiose-producing exo-β-mannanase (EC 3.2.1.-)	2.10225e-05	2.79475e-05	1.37386e-05	0.000149001	3.37263e-05	3.17749e-06	1.70286e-05	3.5516e-05	5.10448e-06	2.88239e-05	7.08057e-05	8.39285e-05	9.41231e-06	2.59607e-06	0	1.91785e-05	2.35247e-05	4.33637e-05	5.47197e-05	6.78312e-06
GH27	α-galactosidase (EC 3.2.1.22); α-N-acetylgalactosaminidase (EC 3.2.1.49); isomalto-dextranase (EC 3.2.1.94); β-L-arabinopyranosidase (EC 3.2.1.88); galactan:galactan galactosyltransferase (EC 2.4.1.-)	2.49642e-05	4.14941e-05	2.58235e-05	7.15098e-05	4.13113e-05	3.55879e-06	6.24383e-06	3.13121e-05	1.66223e-05	3.23391e-05	2.68799e-05	6.50639e-05	9.41231e-06	0	1.0804e-05	7.2664e-06	1.46851e-05	3.74437e-05	4.32181e-05	4.06987e-06
GH28	polygalacturonase (EC 3.2.1.15); α-L-rhamnosidase (EC 3.2.1.40); exo-polygalacturonase (EC 3.2.1.67); exo-polygalacturonosidase (EC 3.2.1.82); rhamnogalacturonase (EC 3.2.1.171); rhamnogalacturonan α-1,2-galacturonohydrolase (EC 3.2.1.173); endo-xylogalacturonan hydrolase (EC 3.2.1.-)	0.000120282	0.000154016	2.82404e-05	0.000346129	0.000208588	4.89334e-05	6.47088e-05	0.000130612	0.000161773	7.9301e-05	0.000163246	0.00026988	4.96761e-05	0	1.3505e-05	0.000266355	0.000181354	0.000269358	0.000249201	4.68035e-05
GH29	α-L-fucosidase (EC 3.2.1.51); α-1,3/1,4-L-fucosidase (EC 3.2.1.111)	0.000223962	0.000254212	0.000130389	0.000854447	0.000331709	6.8888e-05	0.000136229	0.000189902	0.000307971	0.000332249	0.000324395	0.000592761	0.000144322	3.18018e-05	1.28619e-05	0.000277434	0.000262763	0.000479073	0.000441069	0.000131593
GH3	β-glucosidase (EC 3.2.1.21); xylan 1,4-β-xylosidase (EC 3.2.1.37); β-glucosylceramidase (EC 3.2.1.45); β-N-acetylhexosaminidase (EC 3.2.1.52); α-L-arabinofuranosidase (EC 3.2.1.55); glucan 1,3-β-glucosidase (EC 3.2.1.58); glucan 1,4-β-glucosidase (EC 3.2.1.74); isoprimeverose-producing oligoxyloglucan hydrolase (EC 3.2.1.120); coniferin β-glucosidase (EC 3.2.1.126); exo-1,3-1,4-glucanase (EC 3.2.…	0.000599978	0.000671716	0.000355422	0.00123987	0.000746041	0.000528226	0.00018618	0.00065364	0.000846428	0.000575917	0.000829869	0.00101972	0.000239491	7.4637e-05	0.000236273	0.000640753	0.000636734	0.00100003	0.000763636	0.000303205
GH30	endo-β-1,4-xylanase (EC 3.2.1.8); β-glucosidase (3.2.1.21); β-glucuronidase (EC 3.2.1.31); β-xylosidase (EC 3.2.1.37); β-fucosidase (EC 3.2.1.38); glucosylceramidase (EC 3.2.1.45); β-1,6-glucanase (EC 3.2.1.75); glucuronoarabinoxylan endo-β-1,4-xylanase (EC 3.2.1.136); endo-β-1,6-galactanase (EC:3.2.1.164); [reducing end] β-xylosidase (EC 3.2.1.-)	5.9962e-05	9.73891e-05	2.2516e-05	0.000174696	9.40001e-05	3.74944e-05	2.32725e-05	8.3209e-05	0.000198159	4.58371e-05	8.69336e-05	0.00026295	2.14391e-05	0	6.94542e-06	4.94353e-05	3.09385e-05	0.000140451	5.4894e-05	1.28879e-05
GH31	α-glucosidase (EC 3.2.1.20); α-galactosidase (EC 3.2.1.22); α-mannosidase (EC 3.2.1.24); α-1,3-glucosidase (EC 3.2.1.84); sucrase-isomaltase (EC 3.2.1.48) (EC 3.2.1.10); α-xylosidase (EC 3.2.1.177); α-glucan lyase (EC 4.2.2.13); isomaltosyltransferase (EC 2.4.1.-); oligosaccharide α-1,4-glucosyltransferase (EC 2.4.1.161); sulfoquinovosidase (EC 3.2.1.-)	0.00029969	0.000300954	0.000114488	0.00050791	0.000377355	0.00014858	0.00013112	0.000344143	0.000435321	0.000224967	0.000482921	0.000319929	0.000123406	7.85311e-05	6.07081e-05	0.000486015	0.000462367	0.000310058	0.000348707	0.000215025
GH32	invertase (EC 3.2.1.26); endo-inulinase (EC 3.2.1.7); β-2,6-fructan 6-levanbiohydrolase (EC 3.2.1.64); endo-levanase (EC 3.2.1.65); exo-inulinase (EC 3.2.1.80); fructan β-(2,1)-fructosidase/1-exohydrolase (EC 3.2.1.153); fructan β-(2,6)-fructosidase/6-exohydrolase (EC 3.2.1.154); sucrose:sucrose 1-fructosyltransferase (EC 2.4.1.99); fructan:fructan 1-fructosyltransferase (EC 2.4.1.100); sucrose:f…	0.000114191	0.000291313	4.40144e-05	0.000240496	0.000156306	0.000146292	8.34403e-05	0.000167723	0.000382574	0.000134418	0.000312856	0.000255251	0.000134387	4.47822e-05	4.9261e-05	0.000416805	0.000231682	0.000180263	0.000163113	0.000143802
GH33	sialidase or neuraminidase (EC 3.2.1.18); trans-sialidase (EC 2.4.1.-); anhydrosialidase (EC 4.2.2.15); Kdo hydrolase (EC 3.2.1.-); 2-keto-3-deoxynononic acid hydrolase / KDNase (EC 3.2.1.-)	0.000114191	0.000170126	0.00010622	0.000297051	0.000178925	4.01635e-05	0.000109551	0.000104954	0.000192662	0.000173365	0.000122205	0.000299396	6.6409e-05	1.68744e-05	6.55956e-06	0.000106256	0.000197037	0.000303398	0.000293291	6.37613e-05
GH35	β-galactosidase (EC 3.2.1.23); exo-β-glucosaminidase (EC 3.2.1.165); exo-β-1,4-galactanase (EC 3.2.1.-); β-1,3-galactosidase (EC 3.2.1.-)	3.58338e-05	8.04253e-05	4.07069e-05	0.000179454	8.87177e-05	8.76988e-06	2.21372e-05	6.11746e-05	8.31115e-05	3.45887e-05	5.52022e-05	0.000147709	3.24202e-05	4.54312e-06	1.27333e-05	0.000123529	7.27126e-05	9.76793e-05	9.06186e-05	2.50975e-05
GH36	α-galactosidase (EC 3.2.1.22); α-N-acetylgalactosaminidase (EC 3.2.1.49); stachyose synthase (EC 2.4.1.67); raffinose synthase (EC 2.4.1.82)	0.000145247	0.000239567	6.37318e-05	0.000326416	0.000223623	8.46484e-05	7.32231e-05	0.000146558	0.000273941	0.000141026	0.000377761	0.000171322	0.000144322	9.73526e-06	4.00005e-05	0.000425501	0.000227548	0.000288746	0.000277084	0.000180431
GH37	α,α-trehalase (EC 3.2.1.28).	0.000128882	0.000210155	5.02476e-05	3.45313e-05	0.000162807	0.000104476	3.97335e-05	0.000151632	4.05741e-05	0.000110375	4.11722e-05	3.45211e-05	3.71263e-05	6.23057e-05	9.00332e-06	7.01624e-05	9.26729e-06	3.30038e-05	7.49346e-06	7.12228e-05
GH38	α-mannosidase (EC 3.2.1.24); mannosyl-oligosaccharide α-1,2-mannosidase (EC 3.2.1.113); mannosyl-oligosaccharide α-1,3-1,6-mannosidase (EC 3.2.1.114); α-2-O-mannosylglycerate hydrolase (EC 3.2.1.170); mannosyl-oligosaccharide α-1,3-mannosidase (EC 3.2.1.-)	0.000148591	0.000166831	2.11167e-05	0.0002303	0.000196263	8.78259e-05	5.10859e-05	7.40763e-05	0.00036412	7.22708e-05	0.000277453	0.000120631	4.65386e-05	4.67292e-05	1.18329e-05	0.000207628	9.38135e-05	9.56073e-05	0.000145338	5.83348e-05
GH39	α-L-iduronidase (EC 3.2.1.76); β-xylosidase (EC 3.2.1.37).	1.4453e-05	3.5392e-06	5.21557e-06	6.13135e-05	3.12882e-05	1.3981e-05	4.54097e-06	2.18895e-05	1.72767e-05	1.99659e-05	4.06477e-05	3.38794e-05	2.03933e-05	3.8941e-06	1.02895e-06	6.78991e-06	4.13464e-06	2.11639e-05	4.94917e-05	8.13974e-06
GH4	maltose-6-phosphate glucosidase (EC 3.2.1.122); α-glucosidase (EC 3.2.1.20); α-galactosidase (EC 3.2.1.22); 6-phospho-β-glucosidase (EC 3.2.1.86); α-glucuronidase (EC 3.2.1.139); α-galacturonase (EC 3.2.1.67); palatinase (EC 3.2.1.-)	0.000368252	0.00040713	8.26859e-05	0.000248109	0.00027875	0.000204758	0.000124877	0.000314426	0.000750097	0.00021386	0.00033318	0.000225093	0.000202365	0.000110333	5.44058e-05	0.000572973	0.000241805	0.000216819	0.000241185	0.000187892
GH42	β-galactosidase (EC 3.2.1.23); α-L-arabinopyranosidase (EC 3.2.1.-)	0.000101888	3.94194e-05	7.75976e-06	0.00012018	7.73402e-05	4.63914e-05	4.65449e-05	7.19019e-05	0.000197635	5.03365e-05	0.000216088	0.00012384	7.16381e-05	3.24509e-06	4.45021e-05	0.000186425	0.000157116	6.61555e-05	0.000123903	8.34324e-05
GH43	β-xylosidase (EC 3.2.1.37); α-L-arabinofuranosidase (EC 3.2.1.55); xylanase (EC 3.2.1.8); α-1,2-L-arabinofuranosidase (EC 3.2.1.-); exo-α-1,5-L-arabinofuranosidase (EC 3.2.1.-); [inverting] exo-α-1,5-L-arabinanase (EC 3.2.1.-); β-1,3-xylosidase (EC 3.2.1.-); [inverting] exo-α-1,5-L-arabinanase (EC 3.2.1.-); [inverting] endo-α-1,5-L-arabinanase (EC 3.2.1.99); exo-β-1,3-galactanase (EC 3.2.1.145); …	0.000275562	0.000371738	0.000124283	0.00103879	0.00048192	0.000172983	0.000111254	0.000329647	0.000467126	0.000317907	0.000451189	0.000811823	0.000117654	4.54312e-06	0.000122188	0.000546767	0.000499293	0.000734371	0.000553993	0.000106495
GH44	endoglucanase (EC 3.2.1.4); xyloglucanase (EC 3.2.1.151)	0	0	0	0	6.77234e-07	0	0	0	0	0	0	0	0	0	0	0	0	0	2.0912e-06	0
GH45	endoglucanase (EC 3.2.1.4)	0	9.76331e-07	0	1.6314e-06	0	0	0	0	0	0	2.62243e-07	0	0	0	0	0	1.28316e-06	1.92399e-06	0	0
GH46	chitosanase (EC 3.2.1.132)	7.16677e-07	3.05104e-06	0	1.0876e-06	0	0	0	0	0	0	0	3.84993e-07	0	0	3.85857e-07	0	1.56831e-06	0	8.71333e-07	0
GH47	α-mannosidase (EC 3.2.1.113)	3.58338e-07	7.32249e-06	0	4.21445e-06	5.41788e-07	0	0	0	0	2.81209e-07	0	0	0	0	0	0	0	0	0	0
GH49	dextranase (EC 3.2.1.11); isopullulanase (EC 3.2.1.57); dextran 1,6-α-isomaltotriosidase (EC 3.2.1.95); sulfated arabinan endo-1,4-β-L-arabinanase (EC 3.2.1.-)	7.16677e-07	0	0	0	0	0	0	0	0	0	0	0	0	0	0	0	0	0	0	0
GH5	endo-β-1,4-glucanase / cellulase (EC 3.2.1.4); endo-β-1,4-xylanase (EC 3.2.1.8); β-glucosidase (EC 3.2.1.21); β-mannosidase (EC 3.2.1.25); β-glucosylceramidase (EC 3.2.1.45); glucan β-1,3-glucosidase (EC 3.2.1.58); licheninase (EC 3.2.1.73); exo-β-1,4-glucanase / cellodextrinase (EC 3.2.1.74); glucan endo-1,6-β-glucosidase (EC 3.2.1.75); mannan endo-β-1,4-mannosidase (EC 3.2.1.78); cellulose β-1,…	7.17871e-05	7.44453e-05	3.98165e-05	0.000348304	0.000120277	3.62234e-05	4.99506e-05	9.32115e-05	0.000133109	0.000106297	0.000191569	0.000236258	6.43174e-05	0	7.33127e-06	9.68456e-05	0.000124467	0.000161467	0.000289631	5.96914e-05
GH50	β-agarase (EC 3.2.1.81).	6.56954e-06	4.63757e-06	3.05302e-06	6.52561e-06	9.88762e-06	2.0336e-06	5.67621e-06	7.10321e-06	3.79564e-06	6.1866e-06	7.34281e-06	9.75316e-06	0	0	0	2.2633e-06	7.27126e-06	4.29197e-06	7.31919e-06	0
GH51	endoglucanase (EC 3.2.1.4); endo-β-1,4-xylanase (EC 3.2.1.8); β-xylosidase (EC 3.2.1.37); α-L-arabinofuranosidase (EC 3.2.1.55); lichenase / endo-β-1,3-1,4-glucanase (EC 3.2.1.73)	7.21455e-05	7.02959e-05	2.31521e-05	0.000256402	0.000123121	3.07581e-05	2.89487e-05	7.90051e-05	9.69852e-05	6.53811e-05	0.000117092	0.000175942	3.29431e-05	0	1.55629e-05	6.58741e-05	0.000119905	0.000130979	0.000142376	2.78108e-05
GH52	β-xylosidase (EC 3.2.1.37).	0	0	0	1.76735e-06	0	0	0	0	0	0	0	0	0	0	0	0	0	0	5.228e-07	0
GH53	endo-β-1,4-galactanase (EC 3.2.1.89).	1.91114e-05	1.13499e-05	4.07069e-06	9.21742e-05	1.82853e-05	5.59239e-06	1.07848e-05	2.23244e-05	2.25121e-05	2.62931e-05	3.47472e-05	1.42448e-05	1.04581e-06	0	6.68818e-06	8.40996e-05	1.72514e-05	2.84158e-05	0.000139065	2.03494e-05
GH55	exo-β-1,3-glucanase (EC 3.2.1.58); endo-β-1,3-glucanase (EC 3.2.1.39)	2.98615e-06	1.31805e-05	3.43465e-06	1.07401e-05	3.25073e-06	3.81299e-07	0	1.15971e-06	4.67257e-05	8.71749e-06	7.73617e-06	6.15989e-06	5.22906e-06	0	0	2.73979e-05	1.39722e-05	1.09519e-05	5.57653e-06	2.71325e-06
GH56	hyaluronidase (EC 3.2.1.35); chondroitin hydrolase (EC 3.2.1.-)	0	0	0	0	0	3.81299e-06	0	0	0	0	0	0	0	0	0	0	0	0	0	0
GH57	α-amylase (EC 3.2.1.1); α-galactosidase (EC 3.2.1.22); amylopullulanase (EC 3.2.1.41); cyclomaltodextrinase (EC 3.2.1.54); branching enzyme (EC 2.4.1.18); 4-α-glucanotransferase (EC 2.4.1.25)	5.9962e-05	2.99001e-05	4.28695e-05	0.000160285	7.04324e-05	7.49888e-06	8.51431e-06	5.82753e-05	7.4604e-06	0.000105172	5.54644e-05	4.73542e-05	7.32068e-06	0	5.14475e-07	2.00124e-05	0.000129314	0.000123727	9.00958e-05	3.39156e-06
GH59	β-galactosidase (EC 3.2.1.23); galactocerebrosidase (EC 3.2.1.46)	5.97231e-07	2.44083e-07	0	8.15701e-07	6.77234e-07	5.08399e-07	0	2.31942e-06	3.69093e-05	4.21814e-07	2.49131e-06	8.98318e-07	5.22906e-07	0	0	2.38243e-06	0	7.39995e-07	2.78826e-06	2.03494e-06
GH62	α-L-arabinofuranosidase (EC 3.2.1.55)	3.58338e-07	0	0	0	0	0	0	0	0	0	0	0	0	0	0	0	0	0	0	0
GH63	processing α-glucosidase (EC 3.2.1.106); α-1,3-glucosidase (EC 3.2.1.84); α-glucosidase (EC 3.2.1.20); mannosylglycerate α-mannosidase / mannosylglycerate hydrolase (EC 3.2.1.170)	6.68898e-05	0.000131927	2.06079e-05	5.04375e-05	0.000111473	4.53746e-05	1.87315e-05	5.87102e-05	0.000115309	4.94928e-05	4.69415e-05	2.30996e-05	2.71911e-05	3.37489e-05	9.13194e-06	0.000105184	2.09583e-05	6.45276e-05	4.14754e-05	3.2559e-05
GH64	β-1,3-glucanase (EC 3.2.1.39)	0	0	0	3.5347e-06	0	0	0	7.24817e-07	0	0	0	0	0	0	0	0	0	2.07199e-06	0	0
GH65	α,α-trehalase (EC 3.2.1.28); maltose phosphorylase (EC 2.4.1.8); trehalose phosphorylase (EC 2.4.1.64); kojibiose phosphorylase (EC 2.4.1.230); trehalose-6-phosphate phosphorylase (EC 2.4.1.216); nigerose phosphorylase (EC 2.4.1.279); 3-O-α-glucopyranosyl-L-rhamnose phosphorylase (EC 2.4.1.282); 2-O-α-glucopyranosylglycerol: phosphate β-glucosyltransferase (EC 2.4.1.-); α-glucosyl-1,2-β-galactosy…	6.43815e-05	0.000105322	2.31521e-05	5.75069e-05	8.69569e-05	4.89334e-05	3.91658e-05	7.62508e-05	9.37131e-05	9.33615e-05	9.91279e-05	7.5972e-05	2.35308e-05	2.33646e-05	5.28623e-05	0.000205603	0.000159255	5.34276e-05	2.6837e-05	9.3607e-05
GH66	cycloisomaltooligosaccharide glucanotransferase (EC 2.4.1.248); dextranase (EC 3.2.1.11).	4.18061e-06	1.00074e-05	8.3958e-06	2.22958e-05	1.54409e-05	7.62598e-07	1.70286e-06	5.9435e-06	1.43973e-06	6.60842e-06	1.28499e-05	3.06711e-05	0	0	0	0	6.84354e-06	4.75077e-05	3.48533e-06	0
GH67	α-glucuronidase (EC 3.2.1.139); xylan α-1,2-glucuronidase (EC 3.2.1.131)	7.764e-06	7.93269e-06	1.27209e-06	2.84136e-05	2.09943e-05	1.7794e-06	2.8381e-06	1.07273e-05	7.32951e-06	6.88963e-06	3.14692e-06	2.72062e-05	5.22906e-07	0	4.24442e-06	1.4771e-05	1.32594e-05	1.53919e-05	1.49869e-05	3.39156e-06
GH68	levansucrase (EC 2.4.1.10); β-fructofuranosidase (EC 3.2.1.26); inulosucrase (EC 2.4.1.9).	0	0	0	0	0	0	0	0	0	0	0	2.56662e-07	0	0	5.14475e-07	4.76485e-07	1.42574e-06	0	0	0
GH70	dextransucrase (EC 2.4.1.5); alternansucrase (EC 2.4.1.140); reuteransucrase (EC 2.4.1.-); α-4,6-glucanotransferase (EC 2.4.1.-); α-1,2-branched dextransucrase (EC 2.4.1.-); α-4,3-glucanotransferase (EC 2.4.1.-)	0	0	0	1.49545e-06	1.35447e-07	0	0	1.15971e-06	1.43973e-06	0	1.15387e-05	5.38991e-06	0	0	0	4.76485e-07	1.99603e-06	0	3.43305e-05	0
GH72	β-1,3-glucanosyltransglycosylase (EC 2.4.1.-)	0	2.44083e-06	0	0	0	0	0	0	0	0	0	0	0	0	0	0	0	0	0	0
GH73	lysozyme (EC 3.2.1.17); mannosyl-glycoprotein endo-β-N-acetylglucosaminidase (EC 3.2.1.96); peptidoglycan hydrolase with endo-β-N-acetylglucosaminidase specificity (EC 3.2.1.-)	0.000342452	0.000316209	0.00012581	0.00051729	0.000454424	0.000115279	0.000182206	0.00027601	0.000385323	0.000337029	0.000468629	0.000596868	0.000189815	8.17762e-05	0.000127204	0.000852075	0.000742381	0.000404925	0.000266628	0.000489063
GH74	endoglucanase (EC 3.2.1.4); oligoxyloglucan reducing end-specific cellobiohydrolase (EC 3.2.1.150); xyloglucanase (EC 3.2.1.151)	1.4453e-05	1.7574e-05	1.094e-05	3.30359e-05	2.8173e-05	4.32139e-06	4.54097e-06	2.04398e-05	3.96579e-05	5.11801e-05	1.57346e-05	3.34944e-05	5.22906e-06	0	3.72995e-06	1.75108e-05	3.35048e-05	3.41878e-05	2.56172e-05	1.35662e-06
GH75	chitosanase (EC 3.2.1.132)	8.36123e-07	1.56213e-05	1.20849e-05	2.1752e-06	0	1.7794e-06	0	6.37839e-06	0	0	1.70458e-06	2.30996e-06	0	0	1.28619e-07	0	0	1.62799e-06	1.39413e-06	0
GH76	α-1,6-mannanase (EC 3.2.1.101); α-glucosidase (EC 3.2.1.20)	5.72147e-05	4.93047e-05	2.62051e-05	0.000145059	0.000104023	1.9065e-05	2.15696e-05	3.91401e-05	1.81929e-05	6.87557e-05	8.60158e-05	0.000153741	2.35308e-05	0	6.43094e-07	1.5724e-05	7.65621e-05	8.36194e-05	2.40488e-05	1.35662e-05
GH77	amylomaltase or 4-α-glucanotransferase (EC 2.4.1.25)	0.000305663	0.00026483	6.46222e-05	0.000435312	0.000243804	0.000170568	9.42251e-05	0.000229187	0.00032708	0.00022553	0.000424834	0.000198143	8.57566e-05	4.34842e-05	1.37622e-05	0.000218468	0.000241377	0.000433193	0.000410049	0.000109887
GH78	α-L-rhamnosidase (EC 3.2.1.40); rhamnogalacturonan α-L-rhamnohydrolase (EC 3.2.1.174); L-Rhap-α-1,3-D-Apif -specific α-1,3-L-rhamnosidase (EC 3.2.1.-)	0.000106427	9.98299e-05	5.0502e-05	0.000484526	0.000198836	5.87201e-05	4.54097e-05	0.000195991	0.000176825	8.43628e-05	0.00038812	0.000222654	6.37945e-05	0	7.07404e-06	0.000132582	0.000289852	0.000252782	0.000274295	4.74818e-05
GH79	β-glucuronidase (EC 3.2.1.31); hyaluronoglucuronidase (EC 3.2.1.36); heparanase (EC 3.2.1.166); baicalin β-glucuronidase (EC 3.2.1.167); β-4-O-methyl-glucuronidase (EC 3.2.1.-)	1.64836e-05	5.24778e-06	1.3993e-06	4.59511e-05	1.58473e-05	4.70269e-06	3.97335e-06	1.1742e-05	5.23537e-07	1.56071e-05	5.93981e-05	5.26158e-06	0	0	0	3.60938e-05	9.83759e-06	1.58359e-05	8.13825e-05	6.78312e-06
GH8	chitosanase (EC 3.2.1.132); cellulase (EC 3.2.1.4); licheninase (EC 3.2.1.73); endo-1,4-β-xylanase (EC 3.2.1.8); reducing-end-xylose releasing exo-oligoxylanase (EC 3.2.1.156)	6.79649e-05	0.000122408	2.45514e-05	2.61024e-05	7.38186e-05	5.50342e-05	3.2922e-05	0.000110027	2.19885e-05	4.72432e-05	7.05434e-05	3.86277e-05	1.98704e-05	3.7643e-05	4.19297e-05	0.00019381	0.00013573	1.42079e-05	1.35928e-05	7.3936e-05
GH80	chitosanase (EC 3.2.1.132)	3.70283e-06	0	0	2.88214e-05	5.68877e-06	0	0	2.02949e-06	0	1.44823e-05	6.6872e-06	0	0	0	0	0	1.71088e-06	7.69595e-06	3.1368e-06	0
GH81	endo-β-1,3-glucanase (EC 3.2.1.39)	1.07502e-06	0	0	4.21445e-06	0	0	0	6.23343e-06	0	7.31144e-06	6.55608e-07	0	0	0	0	0	7.12869e-07	4.14397e-06	0	0
GH82	Ι-carrageenase (EC 3.2.1.157)	1.79169e-06	0	3.56186e-06	2.85495e-06	0	0	0	3.47912e-06	0	2.81209e-07	2.62243e-06	2.56662e-07	0	0	0	0	5.70295e-07	3.40398e-06	8.88759e-06	0
GH84	N-acetyl β-glucosaminidase (EC 3.2.1.52); hyaluronidase (EC 3.2.1.35); [protein]-3-O-(GlcNAc)-L-Ser/Thr β-N-acetylglucosaminidase (EC 3.2.1.169)	5.02868e-05	6.45599e-05	4.54137e-05	0.00013663	9.15621e-05	2.26238e-05	8.06022e-05	4.91426e-05	0.00022643	0.000125279	0.000120763	0.000185567	5.22906e-05	2.27156e-05	3.47271e-06	0.000164149	7.21423e-05	0.000122395	0.000172698	4.40903e-05
GH85	endo-β-N-acetylglucosaminidase (EC 3.2.1.96)	2.09031e-05	1.68417e-05	1.05584e-05	2.66462e-05	4.60519e-05	0	1.53258e-05	2.85578e-05	2.4868e-06	0.000195159	1.46856e-05	3.45211e-05	3.13744e-06	6.49017e-06	5.14475e-07	3.94292e-05	5.08988e-05	8.33234e-05	1.08045e-05	1.0853e-05
GH87	mycodextranase (EC 3.2.1.61); α-1,3-glucanase (EC 3.2.1.59)	0	0	0	8.83676e-06	0	0	0	1.73956e-06	0	4.21814e-07	0	0	0	0	0	0	0	3.99597e-06	0	0
GH88	d-4,5-unsaturated β-glucuronyl hydrolase (EC 3.2.1.-)	9.24513e-05	0.000111668	2.46786e-05	0.000151448	0.000127185	3.63505e-05	2.95163e-05	8.3209e-05	0.000127481	5.98976e-05	8.0902e-05	0.000294392	5.75196e-05	5.84116e-06	3.60133e-06	0.000106375	0.000206874	0.000140451	0.000107697	3.73072e-05
GH89	α-N-acetylglucosaminidase (EC 3.2.1.50)	5.26757e-05	5.35762e-05	4.87211e-05	0.000226357	0.000145064	7.49888e-06	3.06515e-05	5.84203e-05	4.10976e-05	0.000106297	5.7169e-05	9.689e-05	2.35308e-05	9.08624e-06	1.80066e-06	6.64697e-05	9.82333e-05	0.000148443	9.86348e-05	2.44192e-05
GH9	endoglucanase (EC 3.2.1.4); endo-β-1,3(4)-glucanase / lichenase-laminarinase (EC 3.2.1.6); β-glucosidase (EC 3.2.1.21); lichenase / endo-β-1,3-1,4-glucanase (EC 3.2.1.73); exo-β-1,4-glucanase / cellodextrinase (EC 3.2.1.74); cellobiohydrolase (EC 3.2.1.91); xyloglucan-specific endo-β-1,4-glucanase / endo-xyloglucanase (EC 3.2.1.151); exo-β-glucosaminidase (EC 3.2.1.165)	1.64836e-05	3.31953e-05	1.60283e-05	3.61627e-05	4.15822e-05	1.53791e-05	0	2.75431e-05	3.6124e-05	3.64166e-05	4.13033e-05	2.42546e-05	2.09162e-06	0	0	4.76485e-06	4.56236e-05	3.78877e-05	4.16497e-05	1.28879e-05
GH91	inulin lyase [DFA-I-forming] (EC 4.2.2.17); inulin lyase [DFA-III-forming] (EC 4.2.2.18); difructofuranose 1,2':2,3' dianhydride hydrolase [DFA-IIIase] (EC 3.2.1.-)	9.55569e-07	7.32249e-07	2.54418e-06	2.9909e-06	3.11528e-06	6.35499e-07	3.97335e-06	3.33416e-06	9.16189e-07	5.62418e-07	1.04897e-06	7.69987e-07	0	0	0	1.54858e-06	3.2792e-06	4.43997e-06	1.28957e-05	0
GH92	mannosyl-oligosaccharide α-1,2-mannosidase (EC 3.2.1.113); mannosyl-oligosaccharide α-1,3-mannosidase (EC 3.2.1.-); mannosyl-oligosaccharide α-1,6-mannosidase (EC 3.2.1.-); α-mannosidase (EC 3.2.1.24); α-1,2-mannosidase (EC 3.2.1.-); α-1,3-mannosidase (EC 3.2.1.-); α-1,4-mannosidase (EC 3.2.1.-); mannosyl-1-phosphodiester α-1,P-mannosidase (EC 3.2.1.-)	0.000184067	0.000173543	0.000108128	0.000863011	0.000447517	2.1607e-05	8.2305e-05	0.000248467	7.10701e-05	0.00038835	0.000331738	0.000467895	6.32716e-05	0	5.14475e-06	0.000217873	0.000462794	0.00057468	0.000280569	6.37613e-05
GH93	exo-α-L-1,5-arabinanase (EC 3.2.1.-)	7.64455e-06	1.57433e-05	1.01767e-06	5.57395e-05	9.48128e-06	1.6523e-06	5.67621e-06	1.34816e-05	5.23537e-07	8.01446e-06	7.8673e-07	5.60807e-05	3.66034e-06	0	0	2.50155e-06	5.4178e-06	1.39119e-05	2.30032e-05	6.78312e-07
GH94	cellobiose phosphorylase (EC 2.4.1.20); laminaribiose phosphorylase (EC 2.4.1.31); cellodextrin phosphorylase (EC 2.4.1.49); chitobiose phosphorylase (EC 2.4.1.-); cyclic β-1,2-glucan synthase (EC 2.4.1.-); cellobionic acid phosphorylase (EC 2.4.1.321); β-1,2-oligoglucan phosphorylase (EC 2.4.1.-)	3.97756e-05	2.77034e-05	9.15906e-06	0.00014737	5.28243e-05	1.06764e-05	1.87315e-05	3.52261e-05	8.21953e-05	2.69961e-05	7.1199e-05	5.67223e-05	1.35956e-05	5.84116e-06	1.02895e-06	2.16801e-05	5.74572e-05	6.86715e-05	7.05779e-05	2.91674e-05
GH95	α-L-fucosidase (EC 3.2.1.51); α-1,2-L-fucosidase (EC 3.2.1.63); α-L-galactosidase (EC 3.2.1.-)	9.72292e-05	0.000120211	6.81841e-05	0.000358365	0.00023351	3.91467e-05	9.99013e-05	0.000135686	0.000258889	0.000178146	0.000193011	0.000371262	0.00012236	1.10333e-05	3.85857e-06	0.000169033	0.000214288	0.000260922	0.000269765	0.00011667
GH96	α-agarase (EC 3.2.1.158)	0	0	2.54418e-07	2.58305e-06	0	0	0	0	0	0	1.44234e-06	5.13324e-07	0	0	0	0	0	0	0	0
GH97	glucoamylase (EC 3.2.1.3); α-glucosidase (EC 3.2.1.20); α-galactosidase (EC 3.2.1.22)	0.000108218	0.000140592	7.31452e-05	0.000467668	0.000239606	1.89379e-05	3.97335e-05	0.000133511	8.74306e-05	0.000201205	0.000162984	0.000285793	3.3466e-05	0	2.95823e-06	0.000104589	0.000216712	0.000299698	0.000299913	5.29083e-05
GH98	blood-group endo-β-1,4-galactosidase (EC 3.2.1.102); blood group A- and B-cleaving endo-β-1,4-galactosidase (EC 3.2.1.-); endo-β-1,4-xylanase (EC 3.2.1.8); endo-β-1,4-xylanase (EC 3.2.1.8)	3.82228e-06	2.44083e-06	1.14488e-06	3.5347e-06	2.43804e-06	2.92329e-06	5.10859e-06	2.60934e-06	2.19885e-05	4.63995e-06	1.28499e-05	2.51529e-05	1.77788e-05	0	3.85857e-07	3.21628e-06	7.12869e-06	6.06796e-06	1.20244e-05	1.42446e-05
GH99	glycoprotein endo-α-1,2-mannosidase (EC 3.2.1.130); mannan endo-1,2-α-mannanase (3.2.1.-)	1.86336e-05	2.26997e-05	4.83395e-06	4.05131e-05	3.4539e-05	7.75308e-06	6.81145e-06	2.08747e-05	1.17796e-06	1.99659e-05	3.47472e-05	9.48367e-05	5.75196e-06	0	0	4.58617e-05	1.19762e-05	4.15877e-05	3.11937e-05	8.13974e-06
GT1	UDP-glucuronosyltransferase (EC 2.4.1.17); zeatin O-β-xylosyltransferase (EC 2.4.2.40); 2-hydroxyacylsphingosine 1-β-galactosyltransferase (EC 2.4.1.45); N-acylsphingosine galactosyltransferase (EC 2.4.1.47); flavonol 3-O-glucosyltransferase (EC 2.4.1.91); anthocyanidin 3-O-glucosyltransferase (EC 2.4.1.115); sinapate 1-glucosyltransferase (EC 2.4.1.120); indole-3-acetate β-glucosyltransferase (E…	3.5595e-05	0.000149257	2.32793e-05	7.74916e-05	9.07494e-05	3.27917e-05	2.04344e-05	7.65407e-05	6.16465e-05	0.000115999	5.50711e-05	6.07006e-05	1.83017e-05	2.66097e-05	8.10299e-06	3.57364e-05	2.89425e-05	3.81837e-05	4.42637e-05	4.3412e-05
GT10	galactoside α-1,3/1,4-L-fucosyltransferase (EC 2.4.1.65); galactoside α-1,3-L-fucosyltransferase (EC 2.4.1.152); glycoprotein α-1,3-L-fucosyltransferase (EC 2.4.1.214)	5.39897e-05	4.82064e-05	3.33288e-05	1.29153e-05	3.60289e-05	1.91921e-05	3.40573e-06	2.3629e-05	0	4.69619e-05	1.20632e-05	2.47679e-05	8.36649e-06	0	1.15757e-06	3.45452e-06	4.31998e-05	4.23277e-05	2.24804e-05	0
GT101	glucosyltransferase (EC 2.4.1.-)	2.34114e-05	2.99001e-05	2.28976e-06	1.33231e-05	7.99137e-06	1.29642e-05	3.40573e-06	7.5381e-06	4.05741e-06	1.0686e-05	1.46856e-05	6.14706e-05	2.61453e-06	1.94705e-06	5.14475e-07	1.26269e-05	3.76395e-05	1.73159e-05	1.98664e-05	2.03494e-06
GT102	dTDP-β-L-Rhap : O-antigen-polysaccharide α-1,3-L-rhamnosyltransferase (EC 2.4.1.289)	4.77785e-07	0	2.16255e-06	5.1661e-06	2.0317e-06	7.49888e-06	0	8.69781e-07	0	5.62418e-06	7.8673e-07	0	0	0	3.85857e-07	0	2.6091e-05	3.10798e-06	5.40226e-06	0
GT103	UDP-GlcpNAc: O-antigen-polysaccharide β-1,4-N-acetylglucosaminyltransferase (EC 2.4.1.56)	9.55569e-07	0	2.41697e-06	2.4471e-06	0	5.71949e-06	0	8.69781e-07	5.23537e-07	3.65572e-06	7.8673e-07	5.13324e-07	0	0	3.85857e-07	0	0	2.95998e-07	4.7052e-06	0
GT104	dTDP-β-L-Rhap : arginine α-L-rhamnosyltransferase (EC 2.4.1.-)	0	1.70858e-06	3.30744e-06	1.0876e-06	0	0	0	2.75431e-06	0	0	7.8673e-07	5.13324e-07	0	0	1.28619e-06	4.16925e-06	5.70295e-07	5.91996e-07	0	0
GT11	GDP-L-Fuc: galactoside α-1,2-L-fucosyltransferase (EC 2.4.1.69); GDP-L-Fuc: β-LacNac α-1,3-L-fucosyltransferase (EC 2.4.1.-)	2.40087e-05	6.56583e-05	4.57953e-05	0.00012657	9.52192e-05	2.6818e-05	1.192e-05	4.94325e-05	5.86361e-05	7.05835e-05	6.13649e-05	0.000109851	1.46414e-05	3.30999e-05	2.0579e-06	3.68085e-05	5.36077e-05	6.74875e-05	3.93842e-05	1.89927e-05
GT12	[N-acetylneuraminyl]-galactosylglucosylceramide N-acetylgalactosaminyltransferase (EC 2.4.1.92).	3.22505e-06	7.68861e-06	3.49825e-05	4.83982e-05	5.14698e-06	1.76669e-05	3.97335e-06	1.46413e-05	4.39771e-05	5.61012e-05	3.14692e-06	1.48864e-05	0	0	2.54665e-05	5.5987e-06	4.27721e-07	2.48638e-05	7.49346e-06	6.78312e-07
GT13	α-1,3-mannosyl-glycoprotein β-1,2-N-acetylglucosaminyltransferase (EC 2.4.1.101)	1.95892e-05	8.42086e-06	1.22121e-05	1.83533e-05	3.22364e-05	3.05039e-06	5.67621e-07	1.39165e-05	0	2.61525e-05	1.63902e-05	3.55477e-05	0	0	5.27337e-06	8.81498e-06	3.13662e-05	2.78238e-05	4.74005e-05	3.39156e-06
GT14	β-1,3-galactosyl-O-glycosyl-glycoprotein β-1,6-N-acetylglucosaminyltransferase (EC 2.4.1.102); N-acetyllactosaminide β-1,6-N-acetylglucosaminyltransferase (EC 2.4.1.150); protein O-β-xylosyltransferase (EC 2.4.2.26); UDP-GlcA:arabinogalactan β-glucuronosyltransferase (EC 2.4.1.-)	7.58483e-05	2.45303e-05	1.42474e-05	6.32168e-05	2.97983e-05	2.77077e-05	2.15696e-05	2.47887e-05	7.43422e-05	6.24284e-05	0.000105422	9.70183e-05	9.41231e-06	1.29803e-06	3.21547e-05	0.000170343	0.000140293	9.63473e-05	6.69183e-05	2.84891e-05
GT15	glycolipid 2-α-mannosyltransferase (EC 2.4.1.131); GDP-Man: α-1,2-mannosyltransferase (EC 2.4.1.-).	7.16677e-07	3.13646e-05	0	0	0	0	0	1.01474e-06	0	0	0	5.13324e-07	0	0	0	2.38243e-06	0	0	0	2.03494e-06
GT16	α-1,6-mannosyl-glycoprotein β-1,2-N-acetylglucosaminyltransferase (EC 2.4.1.143).	0	0	0	0	0	0	1.70286e-06	0	0	0	0	0	0	0	0	0	0	0	0	0
GT17	β-1,4-mannosyl-glycoprotein β-1,4-N-acetylglucosaminyltransferase (EC 2.4.1.144).	9.55569e-07	3.05104e-06	0	2.58305e-06	7.44958e-06	5.08399e-07	0	1.88452e-06	3.14122e-06	8.29567e-06	4.98262e-06	2.95162e-06	0	0	0	2.62067e-06	0	1.92399e-06	1.39413e-06	0
GT19	lipid-A-disaccharide synthase (EC 2.4.1.182).	0.000159938	0.000150111	0.000275535	0.000163276	0.000158337	0.000181498	4.54097e-05	0.000182799	9.93411e-05	0.000231295	0.000111191	0.000113188	4.18325e-05	4.02391e-05	0.000253765	0.000111021	0.000178502	0.000191363	0.000104734	6.71529e-05
GT2	cellulose synthase (EC 2.4.1.12); chitin synthase (EC 2.4.1.16); dolichyl-phosphate β-D-mannosyltransferase (EC 2.4.1.83); dolichyl-phosphate β-glucosyltransferase (EC 2.4.1.117); N-acetylglucosaminyltransferase (EC 2.4.1.-); N-acetylgalactosaminyltransferase (EC 2.4.1.-); hyaluronan synthase (EC 2.4.1.212); chitin oligosaccharide synthase (EC 2.4.1.-); β-1,3-glucan synthase (EC 2.4.1.34); β-1,4-…	0.00297194	0.00275252	0.00181387	0.00485913	0.00362632	0.00202406	0.00066809	0.00286172	0.00321452	0.00345311	0.00397954	0.00279069	0.000783313	0.000327105	0.00116593	0.00325439	0.0036017	0.0045008	0.00296358	0.00114838
GT20	α,α-trehalose-phosphate synthase [UDP-forming] (EC 2.4.1.15); Glucosylglycerol-phosphate synthase (EC 2.4.1.213); trehalose-6-P phosphatase (EC 3.1.3.12); [retaining] GDP-valeniol: validamine 7-phosphate valeniolyltransferase (EC 2.-.-.-)	5.39897e-05	0.000102149	0.000224524	1.03322e-05	7.76111e-05	0.0001135	1.58934e-05	0.000105388	2.42136e-05	0.000111078	1.67836e-05	2.10463e-05	1.83017e-05	2.72587e-05	0.000201674	3.89527e-05	7.84155e-06	2.76758e-05	3.83386e-06	3.45939e-05
GT21	UDP-Glc: ceramide β-glucosyltransferase (EC 2.4.1.80).	2.41281e-05	7.20044e-06	3.43465e-06	1.78095e-05	1.12421e-05	1.3981e-06	0	6.08846e-06	8.11482e-06	9.84232e-06	5.24486e-06	1.28331e-06	2.61453e-06	0	4.1158e-06	8.9341e-06	1.95326e-05	3.09318e-05	2.52686e-05	0
GT22	Dol-P-Man: Man6GlcNAc2-PP-Dol α-1,2-mannosyltransferase (EC 2.4.1.259); Dol-P-Man: Man8GlcNAc2-PP-Dol α-1,2-mannosyltransferase (EC 2.4.1.261); Dol-P-Man: Man2-GlcNAc-phosphatidylinositol α-1,2-mannosyltransferase (EC 2.4.1.-); Dol-P-Man: Man3-GlcNAc-phosphatidylinositol α-1,2-mannosyltransferase (EC 2.4.1.-)	3.34449e-06	1.02515e-05	3.81627e-07	1.22355e-06	1.30029e-05	0	0	1.44963e-06	3.10196e-05	8.43628e-07	1.96682e-06	2.56662e-07	1.56872e-06	0	0	0	7.69898e-06	7.39995e-07	0	0
GT23	N-acetyl-β-D-glucosaminide α-1,6-L-fucosyltransferase (EC 2.4.1.68); chitin-oligosaccharide α-1,6-L-fucosyltransferase (EC 2.4.1.-)	1.48113e-05	1.96487e-05	6.61487e-06	5.07094e-05	4.51038e-05	2.28779e-06	0	2.62384e-05	1.5837e-05	3.48699e-05	2.16351e-05	3.27244e-05	3.13744e-06	0	2.57238e-07	2.39434e-05	6.84354e-06	5.59436e-05	4.4438e-05	4.74818e-06
GT24	UDP-Glc: glycoprotein α-glucosyltransferase (EC 2.4.1.-).	0	2.92899e-06	0	1.22355e-06	2.70894e-07	0	0	0	0	0	0	0	0	0	0	0	1.92475e-05	0	6.97066e-07	0
GT25	lipopolysaccharide β-1,4-galactosyltransferase (EC 2.4.1.-); β-1,3-glucosyltransferase (EC 2.4.1.-); β-1,2-glucosyltransferase (EC 2.4.1.-); β-1,2-galactosyltransferase (EC 2.4.1.-); LPS β-1,4-galactosyltransferase (EC 2.4.1.-); occidiofungin β-xylosyltransferase (EC 2.4.2.-); UDP-Gal:procollagen β-galactosyltransferase (EC 2.4.1.50)	5.37508e-06	2.19675e-06	0.000218164	8.56486e-06	1.44928e-05	0.000270341	0	6.04498e-05	0	0.000148478	1.57346e-06	1.79664e-06	0	6.49017e-07	0.000200774	2.87082e-05	3.42177e-06	1.64279e-05	4.7052e-06	0
GT26	UDP-ManNAcA: β-N-acetyl mannosaminuronyltransferase (EC 2.4.1.-); UDP-ManNAc: β-N-acetyl-mannosaminyltransferase (EC 2.4.1.-); UDP-Glc: β-1,4-glucosyltransferase (EC 2.4.1.-); β-1,4-galactosyltransferase (EC 2.4.1.-)	0.000249045	0.000226265	9.96047e-05	0.000153488	0.000205473	0.000148834	8.00346e-05	0.000221649	0.000171851	0.000189816	0.000207303	0.000204816	9.30772e-05	4.60802e-05	3.3055e-05	0.000214776	0.000241805	0.000254262	0.000185942	0.000107852
GT27	polypeptide α-N-acetylgalactosaminyltransferase (EC 2.4.1.41)	7.64455e-05	6.08987e-05	5.38095e-05	0.000229212	0.00012434	3.68589e-05	7.37907e-06	7.30616e-05	0.000124471	0.000138355	0.000153412	3.5676e-05	7.84359e-06	1.94705e-06	3.38268e-05	7.21875e-05	0.000128031	0.000162355	0.000119198	1.62795e-05
GT28	1,2-diacylglycerol 3-β-galactosyltransferase (EC 2.4.1.46); 1,2-diacylglycerol 3-β-glucosyltransferase (EC 2.4.1.157); UDP-GlcNAc: Und-PP-MurAc-pentapeptide β-N-acetylglucosaminyltransferase (EC 2.4.1.227); digalactosyldiacylglycerol synthase (EC 2.4.1.241)	0.000501196	0.000296439	0.000280878	0.000501928	0.000362727	0.000304404	0.000120336	0.000291377	0.000435975	0.000322406	0.00048633	0.000339436	0.00012236	5.58155e-05	0.000203346	0.000396197	0.000558176	0.000568908	0.000416671	0.000156012
GT29	sialyltransferase (EC 2.4.99.-); β-galactoside α-2,6-sialyltransferase (EC 2.4.99.1); α-N-acetylgalactosaminide α-2,6-sialyltransferase (EC 2.4.99.3); β-galactoside α-2,3-sialyltransferase (EC 2.4.99.4); N-acetyllactosaminide α-2,3-sialyltransferase (EC 2.4.99.6); (α-N-acetyl-neuraminyl-2,3-β-galactosyl-1,3)-N-acetylgalactosaminide α-2,6-sialyltransferase (EC 2.4.99.7); α-N-acetyl-neuraminide α-2…	0	1.58654e-06	0	7.20536e-06	0	0	3.97335e-06	0	0	0	0	0	0	0	0	0	0	0	0	0
GT3	glycogen synthase (EC 2.4.1.11).	3.84617e-05	2.3554e-05	2.7986e-05	0.00012956	6.46082e-05	2.79619e-06	6.81145e-06	4.58084e-05	5.49714e-06	9.32209e-05	4.27456e-05	4.09376e-05	6.27487e-06	0	0	1.22695e-05	9.53818e-05	9.38314e-05	8.15567e-05	3.39156e-06
GT30	CMP-β-KDO: α-3-deoxy-D-manno-octulosonic-acid (KDO) transferase (EC 2.4.99.-).	0.000127927	0.000155603	0.000305683	0.000139893	0.000137208	0.000249497	3.06515e-05	0.000216575	3.90035e-05	0.000208938	6.07093e-05	7.32771e-05	3.13744e-05	3.7643e-05	0.000326306	7.37361e-05	0.000102083	0.000123283	6.65698e-05	4.47686e-05
GT31	N-acetyllactosaminide β-1,3-N-acetylglucosaminyltransferase (EC 2.4.1.149); Glycoprotein-N-acetylgalactosamine 3-β-galactosyltransferase (EC 2.4.1.122); fucose-specific β-1,3-N-acetylglucosaminyltransferase (EC 2.4.1.-); globotriosylceramide β-1,3-GalNAc transferase (EC 2.4.1.79); chondroitin synthase (β-1,3-GlcUA and β-1,4-GalNAc transferase (EC 2.4.1.175); chondroitin β-1,3-glucuronyltransferas…	0	1.23262e-05	1.28481e-05	4.6223e-06	0	1.1439e-06	2.8381e-06	6.81328e-06	1.19105e-05	8.43628e-07	1.96682e-06	3.07995e-06	3.13744e-06	2.59607e-06	7.71713e-07	0	0	0	8.36479e-06	0
GT32	α-1,6-mannosyltransferase (EC 2.4.1.-); α-1,4-N-acetylglucosaminyltransferase (EC 2.4.1.-); α-1,4-N-acetylgalactosaminyltransferase (EC 2.4.1.-); GDP-Man: inositol-phosphorylceramide transferase (EC 2.4.1.-); UDP-Gal: β-galactoside α-1,4-galactosyltransferase (EC 2.4.1.-); UDP-Gal: lactose/N-acetyl-lactosamine α-1,4-galactosyltransferase (EC 2.4.1.-)	0.000111563	8.81139e-05	0.000109909	0.000140029	0.000129487	9.64687e-05	3.00839e-05	7.84252e-05	0.000132455	0.000137793	0.000159706	0.000165804	3.50347e-05	2.59607e-06	7.76858e-05	0.000237528	0.000286003	0.000222294	0.000133488	4.61252e-05
GT33	GDP-Man: chitobiosyldiphosphodolichol β-mannosyltransferase (EC 2.4.1.142).	1.32585e-05	2.69712e-05	4.70674e-06	0	3.92796e-06	1.05493e-05	0	4.3489e-07	0	2.81209e-07	4.58926e-06	0	0	0	5.14475e-06	0	1.89623e-05	1.06559e-05	5.228e-07	0
GT34	UDP-Gal: galactomannan α-1,6-galactosyltransferase (EC 2.4.1.-); UDP-Xyl: xyloglucan α-1,6-xylosyltransferase (EC 2.4.2.39); α-1,2-galactosyltransferase (EC 2.4.1.-)	0	2.80695e-06	0	0	4.06341e-07	0	0	0	0	0	0	0	0	0	0	0	0	0	5.228e-07	0
GT35	glycogen or starch phosphorylase (EC 2.4.1.1).	0.000427737	0.000381379	0.000144764	0.000461279	0.000360424	0.000233609	0.000133391	0.000389082	0.000425505	0.000328171	0.00049446	0.00029452	0.000141707	8.82664e-05	3.78139e-05	0.000372135	0.000400204	0.000470193	0.000368225	0.000199424
GT39	Dol-P-Man: protein α-mannosyltransferase (EC 2.4.1.109)	2.30531e-05	2.91679e-05	2.28976e-05	3.95615e-05	2.87147e-05	1.91921e-05	5.67621e-06	4.14595e-05	3.12813e-05	5.10395e-05	3.9861e-05	1.79664e-05	0	0	1.15757e-06	2.10845e-05	3.16514e-05	3.65557e-05	4.02556e-05	2.1706e-05
GT4	sucrose synthase (EC 2.4.1.13); sucrose-phosphate synthase (EC 2.4.1.14); α-glucosyltransferase (EC 2.4.1.52); lipopolysaccharide N-acetylglucosaminyltransferase (EC 2.4.1.56); phosphatidylinositol α-mannosyltransferase (EC 2.4.1.57); GDP-Man: Man1GlcNAc2-PP-dolichol α-1,3-mannosyltransferase (EC 2.4.1.132); GDP-Man: Man3GlcNAc2-PP-dolichol/Man4GlcNAc2-PP-dolichol α-1,2-mannosyltransferase (EC 2.…	0.0020651	0.0019224	0.00187061	0.00283279	0.00239362	0.00179935	0.000543781	0.00198542	0.00171642	0.00260498	0.00229187	0.00209873	0.0005867	0.00023105	0.00151886	0.00226724	0.00266313	0.00296013	0.00203421	0.000867561
GT40	β-1,3-galactofuranosyltransferases (EC 2.4.1.-)	0	0	1.14488e-05	0	4.06341e-07	0	0	2.89927e-06	0	2.61525e-05	0	1.15498e-06	3.13744e-06	0	2.18652e-06	2.50155e-06	0	0	8.71333e-07	0
GT41	UDP-GlcNAc: peptide β-N-acetylglucosaminyltransferase (EC 2.4.1.255); UDP-Glc: peptide N-β-glucosyltransferase (EC 2.4.1.-)	1.43335e-06	2.31879e-06	1.27209e-06	1.76735e-06	1.76081e-06	0	2.8381e-06	5.79854e-07	0	1.82786e-06	3.54028e-06	1.36031e-05	0	0	0	8.33849e-07	2.28118e-06	3.99597e-06	6.97066e-07	2.03494e-06
GT44	UDP-Glc: α-glucosyltransferase (EC 2.4.1.-); UDP-GlcNAc: α-N-acetylglucosaminyltransferase (EC 2.4.1.-).	3.49977e-05	7.44453e-06	7.95057e-05	3.52111e-05	0.000149262	4.05448e-05	1.192e-05	0.000246873	4.6333e-05	2.53088e-06	7.99842e-06	2.81045e-05	1.0981e-05	5.19214e-06	1.67204e-06	2.88274e-05	5.4178e-06	2.21998e-05	1.06303e-05	2.03494e-06
GT45	α-N-acteylglucosaminyltransferase (EC 2.4.1.-)	3.70283e-06	1.70858e-06	3.68906e-06	7.20536e-06	1.62536e-05	4.19429e-06	2.8381e-06	1.65258e-05	0	1.33574e-05	1.57346e-05	1.73247e-05	6.79778e-06	0	7.58851e-06	1.45328e-05	3.39325e-05	5.17996e-06	2.02149e-05	0
GT46	Deleted	4.6584e-06	2.92899e-06	1.01767e-06	1.07401e-05	2.11297e-05	5.08399e-07	0	1.73956e-06	8.76924e-06	1.39199e-05	1.04897e-06	1.21915e-05	7.84359e-06	0	0	1.46519e-05	2.76593e-05	6.21596e-06	1.20244e-05	1.35662e-06
GT47	heparan β-glucuronyltransferase (EC 2.4.1.225); xyloglucan β-galactosyltransferase (EC 2.4.1.-); heparan synthase (EC 2.4.1.-); arabinan α-L-arabinosyltransferase (EC 2.4.2.-).	1.19446e-07	1.95266e-06	0	0	5.41788e-07	0	0	0	0	0	0	0	0	0	0	0	0	0	0	0
GT48	1,3-β-glucan synthase (EC 2.4.1.34)	3.58338e-07	5.61391e-06	0	0	4.06341e-07	0	0	0	0	0	0	0	0	0	0	0	0	0	0	0
GT49	β-1,3-N-acetylglucosaminyltransferase (EC 2.4.1.-).	1.07502e-06	1.37907e-05	0	0	8.12681e-07	0	0	0	0	0	0	0	0	0	0	0	0	0	0	0
GT5	UDP-Glc: glycogen glucosyltransferase (EC 2.4.1.11); ADP-Glc: starch glucosyltransferase (EC 2.4.1.21); NDP-Glc: starch glucosyltransferase (EC 2.4.1.242); UDP-Glc: α-1,3-glucan synthase (EC 2.4.1.183) UDP-Glc: α-1,4-glucan synthase (EC 2.4.1.-)	0.000329671	0.000257019	0.000114743	0.000489284	0.000322499	0.00014375	8.45755e-05	0.000273691	0.000298416	0.000349965	0.00039284	0.000239209	9.04627e-05	4.41332e-05	3.31837e-05	0.000291252	0.000439127	0.000439113	0.000356375	0.000103103
GT50	Dol-P-Man α-1,4-mannosyltransferase (EC 2.4.1.-)	0	2.92899e-06	1.27209e-06	0	0	0	2.27048e-06	0	0	9.84232e-07	0	1.41164e-06	0	0	1.15757e-06	0	0	0	0	0
GT51	murein polymerase (EC 2.4.1.129).	0.000629362	0.000627415	0.000796202	0.000599404	0.000663825	0.000600673	0.000181071	0.00061363	0.000593036	0.000663935	0.000601192	0.000409761	0.000198704	0.000137592	0.000954866	0.00072795	0.000679934	0.000579416	0.000448039	0.000288961
GT52	α-2,3-sialyltransferase (EC 2.4.99.4); α-glucosyltransferase (EC 2.4.1.-)	5.97231e-07	0	3.71451e-05	0	9.48128e-07	9.40538e-06	0	8.98773e-06	0	3.58542e-05	0	1.41164e-06	0	1.94705e-06	2.53379e-05	0	0	0	1.0456e-06	0
GT53	UDP-L-Ara: α-L-arabinosyltransferase (EC 2.4.2.-)	0	0	0	0	0	0	3.40573e-06	0	0	0	0	2.0533e-06	0	0	0	0	0	0	0	0
GT56	TDP-Fuc4NAc: lipid II Fuc4NAc transferase (EC 2.4.1.-)	7.56094e-05	0.000115939	2.72228e-05	2.85495e-06	7.17868e-05	7.79121e-05	2.66782e-05	0.000109302	2.1465e-05	3.72602e-05	1.0752e-05	7.4432e-06	2.56224e-05	2.92058e-05	2.84248e-05	4.39558e-05	1.42574e-06	1.28759e-05	7.84199e-06	3.93421e-05
GT58	Dol-P-Man: Man5GlcNAc2-PP-Dol α-1,3-mannosyltransferase (EC 2.4.1.258)	0	1.09837e-06	0	0	0	0	0	0	0	0	0	0	0	0	0	0	0	0	0	0
GT6	α-1,3-galactosyltransferase (EC 2.4.1.87); α-1,3 N-acetylgalactosaminyltransferase (EC 2.4.1.40); α-galactosyltransferase (EC 2.4.1.37); globoside α-N-acetylgalactosaminyltransferase (EC 2.4.1.88).	2.62782e-06	1.22041e-06	3.94348e-06	3.67065e-06	2.84438e-06	2.17341e-05	4.54097e-06	9.56759e-06	0	4.21814e-06	2.55687e-05	1.41164e-06	0	3.8941e-06	7.84575e-06	3.21628e-06	7.84155e-06	6.06796e-06	5.57653e-06	6.78312e-06
GT60	UDP-GlcNAc: polypeptide α-N-acetylglucosaminyltransferase (EC 2.4.1.-); UDP-GlcNAc: hydroxyproline polypeptide α-N-acetylglucosaminyltransferase (EC 2.4.1.-)	3.58338e-07	0	0	4.6223e-06	5.41788e-07	0	0	0	0	1.54665e-06	0	0	0	0	0	0	0	0	6.62213e-06	0
GT61	β-1,2-xylosyltransferase (EC 2.4.2.38) ; protein O-β-N-acetylglucosaminyltransferase (EC 2.4.1.94) ; xylan α-1,3-arabinofuranosyltransferase (EC 2.4.2.-) ;	1.19446e-07	1.34246e-06	0	0	0	0	0	0	0	2.81209e-07	0	0	0	0	0	0	0	0	0	0
GT62	α-1,2-mannosyltransferase (EC 2.4.1.-); α-1,6-mannosyltransferase (EC 2.4.1.-)	7.16677e-07	8.17678e-06	0	2.719e-07	0	0	0	0	0	0	0	0	0	0	0	0	0	0	0	0
GT64	UDP-GlcNAc: heparan α-N-acetylhexosaminyltransferase (EC 2.4.1.224)	2.38892e-07	2.44083e-06	0	0	0	0	0	1.44963e-07	0	0	0	0	1.04581e-06	0	0	0	0	0	0	0
GT66	dolichyl-diphosphooligosaccharideâ€”protein glycotransferase (EC 2.4.99.18); undecaprenyl-diphosphooligosaccharideâ€”protein glycotransferase (EC 2.4.99.19)	2.3292e-05	3.5392e-06	1.01767e-06	5.98181e-06	2.27551e-05	2.66909e-06	0	3.1892e-06	0	2.17937e-05	9.57188e-06	2.0533e-06	0	0	0	0	7.98413e-06	9.32394e-06	3.31106e-06	0
GT68	GDP-Fuc: protein O-α-fucosyltransferase (EC 2.4.1.-)	4.77785e-07	5.49186e-06	0	0	1.35447e-07	0	0	0	0	0	0	0	0	0	0	0	0	0	0	0
GT69	GDP-Man: α-1,3-mannosyltransferase (EC 2.4.1.-)	2.38892e-07	1.34246e-06	0	8.15701e-07	0	0	0	0	0	0	0	0	0	0	0	0	0	2.51598e-06	0	0
GT7	lactose synthase (EC 2.4.1.22); β-N-acetylglucosaminyl-glycopeptide β-1,4-galactosyltransferase (EC 2.4.1.38); N-acetyllactosamine synthase (EC 2.4.1.90); xylosylprotein β-4-galactosyltransferase (EC 2.4.1.133); UDP-Gal: neolactotriaosylceramide β-1,4-galactosyltransferase (EC 2.4.1.275); β-1,4-N-acetylglucosaminyltransferase (EC 2.4.1.-)	8.24178e-06	1.63536e-05	8.01417e-06	2.37913e-05	3.41326e-05	1.0168e-06	3.40573e-06	1.39165e-05	3.92653e-07	1.32168e-05	1.78325e-05	4.33759e-05	6.27487e-06	0	0	5.24134e-06	1.56831e-05	3.25598e-05	6.27359e-06	6.78312e-07
GT70	UDP-GlcA: β-glucuronosyltransferase (EC 2.4.1.17)	3.58338e-07	0	2.54418e-07	3.39875e-06	0	2.92329e-06	0	7.24817e-07	2.61768e-06	2.81209e-07	0	0	0	0	0	0	0	0	0	0
GT71	α-mannosyltransferase (EC 2.4.1.-)	3.58338e-07	5.24778e-06	0	0	1.35447e-07	0	0	0	0	0	0	0	0	0	0	0	0	0	0	0
GT72	UDP-Glc: DNA α-glucosyltransferase (EC 2.4.1.26)	0	0	0	0	0	0	0	0	0	0	0	1.15498e-06	1.56872e-06	0	0	0	0	0	0	0
GT73	CMP-β-KDO: α-3-deoxy-D-manno-octulosonic-acid (KDO) transferase (EC 2.4.99.-).	0	0	3.66362e-05	5.438e-07	0	4.19429e-06	0	3.76905e-06	6.54421e-06	2.26373e-05	0	8.98318e-07	0	0	9.53066e-05	0	4.27721e-07	0	0	0
GT74	α-1,2-L-fucosyltransferase (EC 2.4.1.69)	1.31391e-06	0	0	0	0	0	0	0	0	0	0	5.13324e-07	0	0	0	0	0	0	4.35666e-06	0
GT75	UDP-Glc: self-glucosylating β-glucosyltransferase (EC 2.4.1.-); UDP-L-arabinopyranose mutase (EC 5.4.99.-)	0	0	0	0	0	0	0	0	0	0	3.93365e-07	0	0	0	0	0	0	0	0	0
GT76	Dol-P-Man: α-1,6-mannosyltransferase (EC 2.4.1.-)	1.11085e-05	3.78328e-06	3.05302e-06	2.4471e-05	2.84438e-06	1.23287e-05	5.67621e-06	1.34816e-05	2.4868e-06	6.46781e-06	1.92749e-05	1.62981e-05	0	0	0	1.15548e-05	1.05505e-05	1.95359e-05	2.0912e-06	1.01747e-05
GT77	α-xylosyltransferase (EC 2.4.2.39); α-1,3-galactosyltransferase (EC 2.4.1.37); arabinosyltransferase (EC 2.4.2.-); arabinosyltransferase (EC 2.4.2.-)	2.38892e-06	6.22411e-06	2.54418e-06	0	0	2.1607e-06	0	1.88452e-06	0	2.24967e-06	0	0	0	0	2.44376e-06	0	2.99405e-06	0	0	0
GT78	GDP-Man: α-mannosyltransferase (mannosylglycerate synthase) (EC 2.4.1.-)	9.55569e-07	2.0747e-06	1.65372e-06	1.3595e-06	9.48128e-07	0	0	5.79854e-07	0	3.23391e-06	2.36019e-06	2.43829e-06	0	0	0	8.33849e-07	9.98016e-07	1.77599e-06	8.71333e-07	1.35662e-06
GT8	lipopolysaccharide α-1,3-galactosyltransferase (EC 2.4.1.44); UDP-Glc: (glucosyl)lipopolysaccharide α-1,2-glucosyltransferase (EC 2.4.1.-); lipopolysaccharide glucosyltransferase 1 (EC 2.4.1.58); glycogenin glucosyltransferase (EC 2.4.1.186); inositol 1-α-galactosyltransferase (galactinol synthase) (EC 2.4.1.123); homogalacturonan α-1,4-galacturonosyltransferase (EC 2.4.1.43); UDP-GlcA: xylan α-g…	0.000263259	0.000341228	0.000142474	0.000182173	0.000287283	0.000226492	0.000111254	0.000432861	0.000176039	0.00027432	0.000303022	0.00020841	8.73253e-05	8.69683e-05	0.00012849	0.000642898	0.000452101	0.000153031	0.000114145	0.000177718
GT80	β-galactoside α-2,6-sialyltransferase (EC 2.4.99.1); β-galactoside α-2,3-sialyltransferase (EC 2.4.99.4)	4.41951e-06	2.68491e-06	1.01767e-06	1.94409e-05	6.366e-06	0	2.8381e-06	4.63883e-06	0	2.10907e-06	1.74392e-05	1.15498e-06	0	0	0	0	3.42177e-06	1.05079e-05	0	0
GT81	NDP-Glc: glucosyl-3-phosphoglycerate synthase (EC 2.4.1.-); NDP-Man: mannosyl-3-phosphoglycerate synthase (EC 2.4.1.-); ADP-Glc: glucosyl-2-glycerate synthase (EC 2.4.1.-)	2.44865e-05	1.26923e-05	1.57739e-05	4.45916e-05	2.85793e-05	1.43623e-05	1.13524e-05	3.60959e-05	8.12791e-05	2.4887e-05	6.72654e-05	2.34846e-05	1.77788e-05	0	2.62382e-05	1.35798e-05	2.87999e-05	4.12917e-05	2.02149e-05	2.1706e-05
GT82	UDP-GalNAc: β-1,4-N-acetylgalactosaminyltransferase (EC 2.4.1.-)	1.67225e-06	3.90533e-06	1.27209e-06	2.70541e-05	4.87609e-06	0	1.70286e-06	4.92876e-06	0	3.0933e-06	3.93365e-07	4.49159e-06	5.22906e-06	0	0	5.36046e-06	6.70097e-06	2.51598e-06	2.43973e-06	0
GT83	undecaprenyl phosphate-α-L-Ara4N: 4-amino-4-deoxy-β-L-arabinosyltransferase (EC 2.4.2.43); dodecaprenyl phosphate-β-galacturonic acid: lipopolysaccharide core α-galacturonosyl transferase (EC 2.4.1.-)	0.00017045	0.000221139	8.40852e-05	0.000193321	0.000248816	9.92649e-05	4.54097e-05	0.00023774	0.000133895	0.000171959	0.000121943	6.80155e-05	3.97408e-05	5.84116e-05	5.2991e-05	0.000106971	0.000103081	0.000162947	4.9666e-05	7.93625e-05
GT84	cyclic β-1,2-glucan synthase (EC 2.4.1.-);	2.66365e-05	3.41716e-06	5.5972e-06	2.719e-05	2.37032e-05	5.21109e-06	1.13524e-06	1.01474e-05	3.2721e-06	4.63995e-06	9.17851e-06	2.69495e-06	0	0	0	4.16925e-06	4.16315e-05	2.14599e-05	2.33517e-05	4.74818e-06
GT85	β-D-arabinofuranosyl monophosphoryldecaprenol: galactan α-D-arabinofuranosyltransferase (EC 2.4.2.-)	0	0	0	0	0	0	1.13524e-06	0	0	0	0	2.18163e-06	0	0	0	0	0	0	0	0
GT87	polyprenol-P-Man: α-1,2-mannosyltransferase (EC 2.4.1.-)	3.70283e-06	5.85799e-06	2.67139e-06	2.06644e-05	1.1513e-05	2.54199e-07	0	5.9435e-06	1.42664e-05	5.20237e-06	9.96524e-06	3.70877e-05	0	0	0	0	3.12236e-05	2.16079e-05	2.614e-06	0
GT89	β-D-arabinofuranosyl-1-monophosphoryldecaprenol : arabinan β-1,2-arabinofuranosyltransferase (EC 2.4.2.-)	0	0	2.02262e-05	0	9.48128e-07	0	1.13524e-06	3.47912e-06	0	3.36045e-05	0	1.79664e-06	0	0	1.80066e-06	0	0	0	0	0
GT9	lipopolysaccharide N-acetylglucosaminyltransferase (EC 2.4.1.56); heptosyltransferase (EC 2.4.-.-).	0.000429289	0.000612648	0.000192086	0.000121675	0.000352162	0.000253945	9.76308e-05	0.000386038	0.000139653	0.000373446	0.000140693	0.000128588	0.000118177	0.000144731	3.52416e-05	0.000268499	0.000107358	0.000183223	5.34998e-05	0.000202137
GT90	UDP-Xyl: (mannosyl) glucuronoxylomannan/galactoxylomannan β-1,2-xylosyltransferase (EC 2.4.2.-); UDP-Glc: protein O-β-glucosyltransferase (EC 2.4.1.-); UDP-Xyl: protein O-β-xylosyltransferase (EC 2.4.2.-)	1.56474e-05	1.23262e-05	2.16255e-05	5.1661e-05	2.00461e-05	3.81299e-07	5.10859e-06	1.00025e-05	0	1.99659e-05	1.15387e-05	4.05526e-05	6.27487e-06	0	0	5.36046e-06	4.96157e-05	2.66398e-05	3.1368e-06	1.35662e-06
GT91	β-1,2-mannosyltransferase (EC 2.4.1.-)	0	0	0	0	0	0	0	7.24817e-07	0	0	0	0	0	0	0	0	0	0	0	0
GT92	UDP-Gal: N-glycan core α-1,6-fucoside β-1,4-galactosyltransferase (EC 2.4.1.-); UDP-Gal: β-galactoside β-1,4-galactosyltransferase (EC 2.4.1.-)	8.95846e-06	6.34615e-06	8.90464e-07	1.72657e-05	1.51701e-05	3.05039e-06	1.70286e-06	4.3489e-06	1.09943e-05	2.39028e-06	8.5229e-06	5.64657e-06	6.27487e-06	0	1.28619e-07	1.81064e-05	1.99603e-06	2.11639e-05	2.30032e-05	2.03494e-06
GT94	GDP-Man: GlcA-β-1,2-Man-α-1,3-Glc-β-1,4-Glc-α-1-PP-undecaprenol β-1,4-mannosyltransferase (2.4.1.251)	6.8801e-05	3.78328e-05	1.41202e-05	4.94858e-05	3.50807e-05	2.26238e-05	3.97335e-06	2.65283e-05	8.50747e-06	1.54665e-05	4.90395e-05	6.12139e-05	2.09162e-06	0	1.41481e-06	1.26269e-05	3.22217e-05	7.69595e-05	6.04705e-05	0
GT97	CMP-Neu5Ac:α-galactoside α-2,6-sialyltransferase (EC 2.4.99.-); CMP-Neu5Ac:α-glucoside α-2,6-sialyltransferase (EC 2.4.99.-);	0	0	0	2.719e-06	0	0	0	0	0	0	0	0	0	0	0	0	0	0	0	0
GT99	CMP-β-KDO 3-deoxy-β-D-manno-oct-2-ulosonic acid transferase (EC 2.4.99.-)	1.19446e-07	0	4.45232e-06	1.0876e-06	2.43804e-06	5.97369e-06	0	1.88452e-06	7.85305e-07	9.1393e-06	2.88468e-06	0	0	0	2.31514e-06	0	1.28316e-06	3.55198e-06	5.228e-07	0
PL1	pectate lyase (EC 4.2.2.2); exo-pectate lyase (EC 4.2.2.9); pectin lyase (EC 4.2.2.10).	8.74346e-05	0.000139737	3.24383e-05	0.000154031	0.000153732	5.52884e-05	2.1002e-05	0.000128583	3.56005e-05	8.25349e-05	6.46429e-05	0.000150789	2.82369e-05	2.85568e-05	7.71713e-06	6.82565e-05	7.10017e-05	9.79753e-05	0.000125646	3.93421e-05
PL10	pectate lyase (EC 4.2.2.2)	1.54086e-05	1.94046e-05	2.7986e-06	2.33834e-05	3.03401e-05	5.59239e-06	2.8381e-06	8.84277e-06	4.17521e-05	1.0686e-05	1.75703e-05	1.01382e-05	8.36649e-06	0	0	4.22881e-05	1.0693e-05	5.54996e-05	2.70113e-05	8.13974e-06
PL11	rhamnogalacturonan endolyase (EC 4.2.2.23); rhamnogalacturonan exolyase (EC 4.2.2.24)	1.51697e-05	1.7818e-05	2.54418e-06	4.69028e-05	5.82422e-05	4.95689e-06	4.54097e-06	1.72506e-05	2.25121e-05	9.2799e-06	1.14076e-05	4.81242e-05	2.61453e-06	0	1.92928e-06	3.40687e-05	1.62534e-05	4.52877e-05	3.71188e-05	8.81806e-06
PL12	heparin-sulfate lyase (EC 4.2.2.8)	7.41761e-05	6.91975e-05	3.80355e-05	9.36696e-05	0.000113098	2.99955e-05	2.15696e-05	7.45112e-05	6.49186e-05	6.13036e-05	6.97567e-05	0.000262565	4.49699e-05	2.59607e-06	1.81353e-05	5.58679e-05	0.00017836	0.000102119	5.34998e-05	2.71325e-05
PL13	heparin lyase (EC 4.2.2.7)	4.06117e-06	9.64127e-06	2.7986e-06	8.29296e-06	1.3951e-05	0	2.8381e-06	3.76905e-06	2.61768e-07	5.90539e-06	5.63823e-06	2.54096e-05	0	0	0	2.85891e-06	1.05505e-05	9.47194e-06	1.0456e-06	2.71325e-06
PL14	alginate lyase (EC 4.2.2.3); exo-oligoalginate lyase (EC 4.2.2.26); β-1,4-glucuronan lyase (EC 4.2.2.14)	7.16677e-07	3.5392e-06	1.01767e-06	4.75825e-06	0	0	0	0	0	6.46781e-06	0	3.84993e-07	0	1.94705e-06	2.57238e-07	0	5.70295e-07	0	1.74267e-06	0
PL15	oligo-alginate lyase (EC 4.2.2.-); alginate lyase (EC 4.2.2.3)	9.79458e-06	1.39127e-05	5.97883e-06	5.30205e-05	3.26427e-05	2.1607e-06	1.24877e-05	1.40615e-05	2.08106e-05	1.57477e-05	1.97994e-05	6.17273e-05	0	0	3.08685e-06	1.79873e-05	1.92475e-05	2.24958e-05	1.34185e-05	6.10481e-06
PL17	alginate lyase (EC 4.2.2.3); oligoalginate lyase (EC 4.2.2.26)	6.09175e-06	9.76331e-06	2.16255e-06	1.74016e-05	8.6686e-06	1.9065e-06	3.40573e-06	1.46413e-05	9.68543e-06	9.98293e-06	1.08831e-05	6.0059e-05	0	0	0	3.45452e-06	7.41383e-06	1.09519e-05	1.60325e-05	2.71325e-06
PL18	alginate lyase (EC 4.2.2.3); poly(α-L-guluronate) lyase / G-specific alginate lyase (EC 4.2.2.11); MG-specific alginate lyase (EC 4.2.2.-)	0	0	0	4.0785e-07	0	0	0	0	0	0	0	0	0	0	0	0	0	0	1.21987e-06	0
PL2	pectate lyase (EC 4.2.2.2); exo-polygalacturonate lyase (EC 4.2.2.9).	0	0	0	2.03925e-06	0	0	0	0	0	0	0	0	0	0	0	0	0	0	0	0
PL21	heparin lyase (EC 4.2.2.7); heparin-sulfate lyase (EC 4.2.2.8); acharan-sulfate lyase (EC 4.2.2.-)	1.67225e-06	0	5.08836e-07	7.61321e-06	0	0	0	4.3489e-06	0	7.03023e-07	5.24486e-07	0	0	0	0	5.00309e-06	9.83759e-06	2.95998e-07	5.40226e-06	0
PL22	oligogalacturonate lyase / oligogalacturonide lyase (EC 4.2.2.6)	0.000105471	0.000148646	0.000100622	0.00023465	0.000165245	6.03724e-05	3.97335e-05	0.000166998	6.15156e-05	0.000176037	8.23444e-05	0.000173889	3.18973e-05	2.85568e-05	6.68818e-05	0.000108281	0.00014956	0.000170495	0.000110136	5.4265e-05
PL25	ulvan lyase (EC 4.2.2.-).	2.50837e-06	1.34246e-06	0	4.8942e-06	1.86917e-05	0	0	2.02949e-06	0	3.23391e-06	1.04897e-06	0	0	0	0	0	5.13265e-06	1.77599e-06	0	0
PL26	rhamnogalacturonan exolyase (EC 4.2.2.24).	7.04732e-06	1.25703e-05	8.90464e-07	1.25074e-05	7.31413e-06	1.6523e-06	1.70286e-06	7.39314e-06	7.06775e-06	1.40605e-06	4.58926e-06	4.17076e-05	1.56872e-06	0	1.28619e-06	1.04827e-05	1.28316e-06	1.67239e-05	1.23729e-05	1.35662e-06
PL27	L-rhamnose-α-1,4-D-glucuronate lyase (EC 4.2.2.-)	8.12234e-06	1.23262e-05	3.05302e-06	2.1752e-06	8.53315e-06	1.7794e-06	2.8381e-06	2.75431e-06	8.50747e-06	3.51512e-06	1.16698e-05	3.33661e-05	7.84359e-06	0	0	5.47958e-06	2.56633e-06	1.68719e-05	3.48533e-07	4.06987e-06
PL3	pectate lyase (EC 4.2.2.2).	2.15003e-06	2.68491e-06	1.90814e-06	4.48635e-06	4.06341e-07	0	0	2.02949e-06	2.4868e-06	3.79632e-06	5.76935e-06	2.95162e-06	0	0	0	0	1.71088e-06	1.62799e-06	5.92506e-06	1.35662e-06
PL4	rhamnogalacturonan endolyase (EC 4.2.2.23).	3.58338e-06	0	3.81627e-07	1.6314e-06	4.74064e-06	0	0	4.3489e-07	0	1.12484e-06	4.98262e-06	0	1.56872e-06	0	0	0	1.42574e-06	4.43997e-06	0	0
PL5	alginate lyase (EC 4.2.2.3).	3.82228e-06	1.68417e-05	1.71732e-05	1.15558e-05	3.11528e-05	2.0336e-06	1.13524e-06	1.26118e-05	8.11482e-06	3.0933e-06	6.6872e-06	5.71073e-05	0	0	3.85857e-07	3.57364e-07	3.22217e-05	9.61993e-06	3.31106e-06	7.46143e-06
PL6	alginate lyase (EC 4.2.2.3); chondroitinase B (EC 4.2.2.19); MG-specific alginate lyase (EC 4.2.2.-)	1.00335e-05	9.27515e-06	9.15906e-06	1.20996e-05	1.40865e-05	7.62598e-07	2.27048e-06	5.9435e-06	5.23537e-06	7.03023e-06	1.32433e-05	2.81045e-05	2.09162e-06	0	0	4.76485e-07	3.49306e-05	2.27918e-05	9.93319e-06	0
PL7	poly(β-mannuronate) lyase / M-specific alginate lyase (EC 4.2.2.3); α-L-guluronate lyase / G-specific alginate lyase (EC 4.2.2.11); poly-(MG)-lyase / MG-specific alginate lyase (EC 4.2.2.-)	9.55569e-07	0	0.000136623	4.6223e-06	2.70894e-06	0.000111339	0	3.94301e-05	4.31918e-06	6.52405e-05	9.17851e-07	0	0	0	0.000141481	0	1.32594e-05	1.33199e-06	2.614e-06	0
PL8	hyaluronate lyase (EC 4.2.2.1); chondroitin AC lyase (EC 4.2.2.5); xanthan lyase (EC 4.2.2.12); chondroitin ABC lyase (EC 4.2.2.20)	2.23364e-05	6.61465e-05	1.61556e-05	0.00010305	0.000111744	2.28779e-06	1.47581e-05	4.53736e-05	7.0023e-05	2.78397e-05	3.0158e-05	0.000232536	2.30079e-05	0	3.85857e-07	6.40873e-05	0.000119192	7.34075e-05	3.4679e-05	4.06987e-05
PL9	pectate lyase (EC 4.2.2.2); exopolygalacturonate lyase (EC 4.2.2.9); thiopeptidoglycan lyase (EC 4.2.2.-).	2.52031e-05	2.9534e-05	1.84453e-05	5.20689e-05	7.69338e-05	1.7794e-06	1.70286e-06	2.98625e-05	1.70149e-06	1.61695e-05	3.04202e-05	8.02069e-05	1.41185e-05	0	6.43094e-06	4.66956e-05	3.30771e-05	3.71477e-05	3.11937e-05	4.06987e-06
